## **The rapid, massive growth of COVID-19 authors in the scientific literature**

John P.A. Ioannidis (1,2), Maia Salholz-Hillel (2), Kevin W. Boyack (3), Jeroen Baas (4)

(1) Departments of Medicine, of Epidemiology and Population Health, of Biomedical Data Science, and of Statistics, and Meta-Research Innovation Center at Stanford

(METRICS), Stanford University, Stanford, California, USA

(2) Meta-Research Innovation Center Berlin (METRIC-B), QUEST, Berlin Institute of Health, Berlin, Germany

(3) SciTech Strategies, Inc., Albuquerque, New Mexico, USA

(4) Research Intelligence, Elsevier B.V., Amsterdam, the Netherlands

Address correspondence to: John P.A. Ioannidis, Stanford Prevention Research Center, Medical School Office Building, Room X306, 1265 Welch Road, Stanford CA 94305, USA. E-mail: [jioannid@stanford.edu](mailto:jioannid@stanford.edu)

Word count: 4292

Funding: none

Data sharing: all the key data are in the manuscript.

Conflicts of interest

METRICS has been funded by grants from the Laura and John Arnold Foundation. METRIC-B has been funded by a visiting Einstein fellowship from the Einstein Foundation and Stiftung Charite to JPAI. JB is an Elsevier employee and Elsevier runs Scopus which is the source of the data.

Contributions: JPAI had the original idea and wrote the first draft of the paper. JB analyzed the data. All authors interpreted the data and contributed writing the paper and approved the final version. JPAI is guarantor.

Data accessibility statement: Data used for this project come from Scopus which is a subscription bibliometric database. Scopus can be contacted through its website and clarifications about the data and accessibility queries can be offered through communication with one of the authors (Jeroen Baas, [j.baas@elsevier.com](mailto:j.baas@elsevier.com)). Data from Scopus have been used in background work on standardized composite citation indicators across the scientific workforce and this work, data, and code can be found in <https://journals.plos.org/plosbiology/article?id=10.1371/journal.pbio.3000918> and in Mendeley (<https://dx.doi.org/10.17632/btchxktzyw>). Data include multiple productivity (number of papers) and citation metrics. More extensive data than those reported in the main manuscript are available in the Supplementary Tables. They pertain to the number of authors and number of authors with at least 1 COVID-19-related publication (supplementary table 1); number of influential authors and number of them who had at least 1 COVID-19-related publication (supplementary table 2); and scientists with highest composite citation indicator based on their COVID-19 publications indexed in Scopus as of August 1, 2021 (supplementary table 3).

## **ABSTRACT (198 words)**

We examined the extent to which the scientific workforce in different fields was engaged in publishing COVID-19-related papers. According to Scopus (data cut, August 1, 2021), 210,183 COVID-19-related publications included 720,801 unique authors, of which 360,005 authors had published at least 5 full papers in their career and 23,520 authors were at the top 2% of their scientific subfield based on a career-long composite citation indicator. The growth of COVID-19 authors was far more rapid and massive compared with cohorts of authors historically publishing on H1N1, Zika, Ebola, HIV/AIDS and tuberculosis. All 174 scientific subfields had some specialists who had published on COVID-19. In 109 of the 174 subfields of science, at least one in ten active, influential (top-2% composite citation indicator) authors in the subfield had authored something on COVID-19. 52 hyper-prolific authors had already at least 60 (and up to 227) COVID-19 publications each. Among the 300 authors with the highest composite citation indicator for their COVID-19 publications, most common countries were USA (n=67), China (n=52), UK (n=32), and Italy (n=18). The rapid and massive involvement of the scientific workforce in COVID-19-related work is unprecedented and creates opportunities and challenges. There is evidence for hyper-prolific productivity.

**Keywords:** COVID-19, bibliometrics, citations, productivity, authorship

The acute crisis of COVID-19 has challenged the scientific community to generate timely evidence about the new coronavirus and its pandemic. Interest on COVID-19 has spread rapidly and widely across the scientific literature and among researchers. Such an “all hands on deck” response of the scientific workforce during a crisis may have been beneficial in generating ideas and evidence expeditiously. However, many authors publishing on COVID-19 may have lacked proper background expertise. The explosive focus on COVID-19 may have caused some inappropriate “covidization” of research<sup>2,3</sup> and the resulting research, conducted in such haste, may suffer from low validity.<sup>4,5</sup>

Here, we aim to understand which scientific areas and which types of scientists have been most mobilized by the pandemic. The growth of the COVID-19 author cohort is contrasted against what happened in the mobilization of the scientific workforce for 5 other major infectious diseases. We also probe whether there is evidence of hyper-prolific productivity with some scientists rapidly publishing large numbers of papers. Concurrently, we evaluate scientists who have had the highest citation impact for their COVID-19-related work. Finally, we discuss the implications of this rapid “covidization” of the research enterprise.

## **METHODS**

We used a copy of the Scopus database<sup>6</sup> extracted on August 1, 2021. COVID-19 publications have been specified as those returned by the query: TITLE-ABS-KEY(sars-cov-2 OR "coronavirus 2" OR "corona virus 2" OR covid-19 OR {novel coronavirus} OR {novel corona virus} OR 2019-ncov OR covid OR covid19 OR ncovid-19 OR "coronavirus disease 2019" OR "corona virus disease 2019" OR corona-19 OR SARS-nCoV OR ncov-2019) AND PUBYEAR > 2018. We further filtered the dataset using the

Elsevier International Center for the Study of Research (ICSR) Lab infrastructure to publications indexed (loaded) in Scopus in 2020 or 2021 only, and with a publication year of 2020 or greater. In order to evaluate publication dates by month, we have used the publication month and year where available. When publication month was either not available or exceeded the indexing date, we used the indexing date. This accounts, for example, for cases where an article is published today, but the official journal issue is due later. Our evaluation is targeted at the date at which publications became available to the public rather than official publication dates.

We considered both publications in peer-reviewed venues and preprints. To avoid double counting of the same item (e.g., a work published both in a peer-reviewed journal and as a preprint, or in two preprint servers), we identified and filtered out duplicates by matching against author names and titles. Our search-based approach applies methods used for unstructured reference linking<sup>7</sup> and ranks documents based on similarity of fields. We used a combination of author names and titles, as many commonly used fields in reference linking, such as journal title, do not apply. The process first identifies multiple potential duplicate matches based on these fields, and then validates the best match based on the overlap between words in the title and author names. After identifying top candidate matches for de-duplication, the process applies a validation step based on the overlap between words in the title and author names. We excluded all preprints that link to either a non-preprint item, such as journal articles, or another preprint with an earlier date. The result of this step is exclusion of 10,703 preprints.

We further focused on the 3,862,276 authors who have at least one Scopus-indexed publication since 2020 and who have also authored in their entire career at least 5 Scopus-

indexed papers classified as articles, reviews or conference papers. This allows exclusion of authors with limited recent presence in the scientific literature as well as some author IDs that may represent split fragments of the publication record of some more prolific authors.

### **Field classification**

All authors were assigned to their most common field and subfield discipline of their career. We used the Science Metrix classification of science, which is a standard mapping of all science into 21 main fields and 174 subfield disciplines.<sup>8,9</sup>

### **Influential scientists**

We also examined how COVID-19 has affected the publication portfolio of researchers whose work has the largest citation impact in the literature. On the one hand, these scientists are already well established and thus may have less need or interest to venture into a new field. On the other hand, these scientists are also more productive and competitive, therefore they may be faster in moving into a rapidly emerging, new important frontier. We used the career-long statistics calculated with the Scopus database of August 1, 2021, using the code as provided with the supplemental data recently published for the most cited authors across science.<sup>10-12</sup> Each author has been assigned to a main field and main subfield based on the largest proportion of publications across fields and analysis is restricted to the top 2% authors per Science Metrix subfield. We have developed a composite citation indicator<sup>10,11</sup> and accordingly 170,832 scientists can be classified as being in the top 2% of their main subfield discipline based on the citations that their work received through 2020. Of those, 125,869 were active and had published at least 1 paper also in 2020 or early 2021.

## **Topics of prominence**

In order to visualize the growth and spread of the COVID-19 scientific literature across scientific fields and over time, we used a graphical mapping of scientific fields that has been previously developed<sup>13</sup> and which places the 333 Scopus journal categories sequentially around the perimeter of a circle. There are 27 high-level categories that are placed first and ordered in a manner that emerges naturally from a meta-analysis of the layouts of other science maps created using multiple databases and methods.<sup>14</sup> Each of the 27 categories is assigned a unique color. The remaining 306 lower-level journal categories are then ordered within the corresponding high-level categories using factor analyses based on citation patterns. Each of the 333 journal categories thus has a fixed position on the perimeter of the circle.

The full Scopus citation graph of well over 50 million articles and 1 billion citation links was used to cluster articles into over 90,000 topics using established methods.<sup>15</sup> Each topic is assigned a position within the circle based on triangulation of the positions of its constituent papers, each of which takes on the positional characteristics of its journal category. Topics are colored by their dominant journal category and area-sized proportionally based on the number of objects (e.g., papers, authors) being counted for the particular analysis. This circle of science and topic visualization are used in Elsevier's SciVal tool. For the display of authors per topic, we have assigned authors to one topic by taking the topic with the highest proportion of publications per author.

## **Comparison against other infectious diseases**

We performed Scopus searches for terms reflecting 4 other infectious diseases that have manifested as epidemics in modern history (H1N1, AIDS, Ebola, Zika) and

tuberculosis, an epidemic that is ongoing since ancient times and that has probably resulted in the largest cumulative number of deaths over history compared with any other infectious pathogen. One should cautiously interpret comparisons between different infectious diseases considering also for the explosive, pandemic nature of COVID-19 and the relative impact of these various disease entities. We used the search terms TITLE-ABS-KEY("swine flu" OR \*h1n1\*), TITLE-ABS-KEY(\*ebola\*), TITLE-ABS-KEY(\*zika\*), and TITLE-ABS(\*tuberculosis\*). AIDS requires a more thorough search strategy as keywords and title searches will yield many false positives for the target disease. We collected papers based on the Fingerprint engine concepts<sup>29</sup> "Human Immunodeficiency Virus 1", "HIV Infection", "AIDS/HIV", "HIV-1", "HIV Prevention", "HIV Testing", "Human Immunodeficiency Virus 1 Reverse Transcriptase". These concepts are based on a unified controlled thesaurus which among other things, addresses the disambiguation of homonyms such as "hearing aids."

### **Prolific authors and authors with high citation impact of their COVID-19 publication record**

We also mapped the most prolific authors of the published COVID-19 corpus and the authors whose COVID-19 publications to-date had the highest citation impact.

For prolific productivity, we ranked the authors according to decreasing number of COVID-19 published items. We show detailed data on extremely prolific authors with over 30 COVID-19 published items to-date. Hyper-prolific publishing reflects a complex phenomenon and may be generated by true productivity and excellence, but also by misconduct (e.g., gift and honorary authorship), and publication of trivialities or "salami-slicing" where one body of work is cut into multiple "least publishable units." We make no



effort to probe the key drivers in each hyper-prolific author. This is not feasible for the broad scope and number of papers considered in our study, plus misconduct is extremely difficult to prove. Nevertheless, we dissected among hyper-prolific authors whether they published also very large numbers of full papers (articles, reviews, conference proceeding papers) or mostly editorializing and other items that are not full papers.

Citation impact was assessed with the previously proposed citation indicator<sup>10-12</sup> that combines information on 6 indices: total citations, Hirsch h-index, Schreiber hm-index, citations to single-authored papers, citations to first- or single-authored papers, and citations to first-, single- or last-authored papers. This avoids focusing simply on a single traditional metric such as citations, where it is expected that the authors of the earliest highly-cited papers would monopolize the top of the list, even if they had published a single paper and they were co-authors among many other authors. Self-citations are excluded from all calculations.<sup>11,12</sup> We present descriptive data on the institution, country and two most common scientific subfields (per Science Metrix classification) for the top-300 authors in that list.

We avoid comparisons based on statistical tests, as the analyses presented here are descriptive and exploratory.

## **RESULTS**

### **COVID-19 papers and authors**

As of August 1, 2021, Scopus classified 210,863 papers as relevant to COVID-19, which accounts for 3.7% of the 5,728,015 papers across all science published and indexed in Scopus in the period January 1, 2020 until August 1, 2021. The 210,863 published items were classified by Scopus as articles (114,625, 54%), letters (23,029, 11%), reviews

(20,641, 10%), preprints from ArXiv, SSRN, BioRxiv, ChemRxiv, and medRxiv that could not be matched to other publications (17,953, 9%), notes (12,125, 6%), editorials (10,419, 5%), conference papers (2,578, 3%), and other items (4,813, 2%).

The 210,863 COVID-19 papers include 720,801 unique authors (with different Scopus IDs), amounting to over 7% of the 9,736,088 author IDs who have published at least 1 paper of any type and on any topic in 2020 or early 2021. The most common countries of these 720,801 authors were USA (n=143,917), China (n=72,385), UK (n=50,392), Italy (n=45,304), India (n=34,211) and Spain (n=29,954) accounting for a total of 376,163 authors (52%). China had more authors involved in COVID-19 papers until May 2020, after which the USA surpassed China.

Among the 3,862,276 authors who have published anything that is Scopus-indexed in 2020 or early 2021 and who have also authored in their entire career at least 5 Scopus-indexed papers that are classified as articles, reviews or conference papers, by the end of July 2021, 360,005 of these authors (9.3%), had at least one published and indexed COVID-19 paper.

### **Scientific fields and subfields**

Among the 3,862,276 authors, researchers from Public Health and Clinical Medicine (based on their career-long Science Metrix main field) published on COVID-19 at the highest rate: 20.6% (15,886/77,292) of Public Health authors and 17.7% (208,147/1,178,036) of Clinical Medicine authors published COVID-19 research by the end of July 2021. However, publishing COVID-19 research were seen across all 21 major fields. The lowest percentage was seen in the field of Physics & Astronomy (1.7%), from which even 5,364 authors had COVID-19 publications. At the subfield discipline level, the

highest COVID-19 publication rate of authors was seen (Table 1) in Emergency and Critical Care Medicine (37.00%). However, such rates were higher than 10% (i.e., at least one in ten authors in that field had published on COVID-19) in 75 subfield disciplines and higher than 5% (i.e., at least one in twenty authors) in 107 subfield disciplines. All 174 subfields had one or more authors publishing on COVID-19. Supplementary Table 1 gives detailed data for COVID-19 publication rates of authors across all subfield disciplines.

28% of the authors published their COVID-19 research primarily in a subfield discipline that was not among the top 3 subfield disciplines where they had published most commonly during their career. Sometimes the fields of expertise of authors seemed remote from COVID-19, e.g., an expert on solar cells publishing on the epidemiology of COVID-19 in healthcare personnel. Even experts specializing in their past work on remote disciplines such as fisheries, ornithology, entomology or architecture had published on COVID-19.

### **Influential scientists and COVID-19 publications**

Influential scientists were even more likely to have published COVID-19 research (Supplementary Table 2). Among the 125,869 influential scientists active in publishing in 2020 or early 2021, 23,520 (18.7%) had COVID-19 publications in 2020 or early 2021. The publication rate was the highest in the fields of Public Health (39.7%) and Clinical Medicine (34.4%). Among subfield disciplines, the highest publication rate of such active, influential authors was seen (Table 2) in, Emergency & Critical Care Medicine (64.4%), Applied Ethics (60.2%) and Allergy (59.0%). However, publication rates were higher than 10% (i.e., at least one in ten authors in that field had authored something on COVID-19) in

109 of 174 subfield disciplines across science and higher than 5% (i.e., at least one in twenty authors) in 134 subfield disciplines.

### **Topics of prominence**

Figure 1 shows the growth and spread of COVID-19 papers, authors of COVID-19 papers, and high-impact authors of COVID-19 papers (those who belong to the top-2% of impact, as discussed previously) across scientific topics. As shown, there is a strong response of the literature and of the scientific workforce in some specific thematic areas, but there is also increasing and substantial involvement of scientists and respective publications, even in remote topics.

### **Comparison with other infectious diseases**

As shown in Figure 2, the massive growth of authors publishing on COVID-19 has been far more rapid and prominent than the growth of the publishing scientific workforce retrieved with the searches for terms reflecting 5 other infectious diseases. None of the other 5 infectious diseases managed to attract more than one-tenth the number of new authors in a single year (maximum: HIV/AIDS, 17,968 new authors publishing in 2016 who had not published HIV/AIDS items before) compared with the number of authors recruited by COVID-19 (245,222 authors in 2020) (Figure 2A). Moreover, none of the other 5 infectious diseases reached such a large number of active authors publishing in any single year (maxima of 54,409 active authors on HIV/AIDS in 2016, 28,274 active authors on tuberculosis in 2016, 13,983 active authors on H1N1 in 2011, 10,182 active authors on Zika in 2017, 6,855 active authors on Ebola in 2016).

### **Productivity for COVID-19 publications**

A total of 9,809 author IDs in Scopus had 10 or more Scopus-indexed published COVID items. Setting thresholds of at least 15, 20, 25, 30, 40, 50 and 60 items, the numbers amounted to 3,661, 1,674, 932, 539, 220, 113 and 54 separate author IDs, respectively. Figure 3 shows the distribution of COVID publication frequency of authors and Table 2 the 53 authors with 60 or more COVID-19 published items indexed in Scopus (one author had two separate Scopus author ID files which we merged). Of these 53 extremely prolific authors, 5 were BMJ news journalists (including the author with the highest number of published items, Elisabeth Mahase, n=227 published items), two were editors of the New England Journal of Medicine, and one was a journalist at Option/Bio. Among the remaining 45 scientists, the most common countries were USA (n=7), UK (n=6) Italy (n=6) and India (n=5). When limited to full papers (articles, reviews, conference proceeding papers), there were 7 authors who had published 60 or more such full papers and 50 authors had published 40 or more.

### **Authors with highest citation impact for COVID-19 publications**

Supplementary Table 3 shows the characteristics of COVID-19 authors ranked with the highest citation impact based on the composite citation indicator for their COVID-19-related publications. Among the 300 authors with the highest composite citation indicator scores, 30 were journalists or editors publishing news stories or editorials in their high-impact general medical or science journals. Most common countries for the remaining authors were USA (n=67), China (n=52), UK (n=32), Italy (n=18), Hong-Kong (n=14) and India (n=12). Of the 270 scientists excluding journalists/editors, Microbiology was one of their top 2 publishing Science Metrix subfields for 99, followed by General & Internal Medicine (n=60), Virology (n=56) and Immunology (n=34).

## DISCUSSION

More than 700,000 scientists (and counting) have published work related to COVID-19. The most influential scientists across science were even more commonly engaged with COVID-19 research. More than one in six active, influential scientists quickly added or adjusted their publishing portfolio to include COVID-19. More than half of the active, influential scientists in several scientific subfields were involved urgently in COVID-19 work, and every single scientific subfield had some scientists publishing on COVID-19.

The rapid and extensive spread of COVID-19 interests across the map of science was unique compared with other major epidemic infectious diseases. A comparison against 5 other major epidemic infectious diseases showed that none of them came anywhere close to the explosive nature of the involvement of the scientific workforce in COVID-19-related work. This applied even to HIV/AIDS and tuberculosis that have had a far greater cumulative mortality toll. HIV/AIDS has killed over 35 million people and tuberculosis has killed over 1 billion people to-date.<sup>16,17</sup>

Our data even underestimate the explosive growth of COVID-19-related work, since some papers are published but not yet indexed. Some of this deficit is captured by preprints (a popular method of disseminating information in the COVID-19 era),<sup>18-20</sup> but the COVID-19 literature is substantially larger than what is indexed in Scopus. The COVID-19 Global Literature on Coronavirus Disease database maintained by the World Health Organization included 318,173 published items as of July 31, 2021 (including 23,673 preprints) (<https://search.bvsalud.org/global-literature-on-novel-coronavirus-2019->

ncov/). It is possible that authors publishing on COVID-19 may be approaching (or have exceeded) a million as of this writing.

Many authors had published an astonishingly large number of COVID-19 items, and 53 had published 60 or more in such short time. Given delays in indexing, these numbers may underestimate the hyper-prolific productivity. The concentration of hyper-prolific authors in countries like China, Hong Kong, and Italy may be related to the early outbreak of the pandemic in these locations, as well as prevalent co-authorship practices in these countries. Some of the unethical and questionable practices surrounding authorship may cluster in specific countries and specific research environments that overtly game and manipulate authorship, through practices such as gift or honorary authorship. Importantly, meritorious productivity versus sloppiness is difficult to disentangle without examining each case in depth. A large share of the hyper-prolific authors capitalized mostly on copious publishing of editorializing items rather than full papers (articles, reviews or conference proceeding papers).

We also addressed the citation impact of authors for their COVID-19 work. The top ranks included many journalists and editors who published numerous news stories and editorials in their highly visible medical and science journals. This news/editorial function may be helpful. These published items may be readily used for citations, as they are often published well in advance of the scientific work to which they refer. However, the quality, standards and validity of rapidly deployed non-peer-reviewed items is unknown. Flashy news, media, and editorializing in both academic journals and the popular press may be prominent during the pandemic.<sup>21-24</sup> It is unknown whether non-peer-reviewed news stories and in-house editorials in major journals help safeguard against the “infodemic” or

sometimes contribute to make things worse. Excluding journalists and editors of prestigious journals, the key countries of the authors with the highest composite citation indicator tended to be similar to the countries of the most prolific authors. A few subfields accounted for the lion's share of the authors with the highest composite citation indicator.

The rapid response of the scientific community to crisis is largely a welcome phenomenon. Many scientists quickly focused their attention to an urgent situation and an entirely new pathogen and disease. This demonstrates that the scientific community has sufficient flexibility to shift attention rapidly to major issues. Much was swiftly learned on COVID-19. The quality of the published work was not assessed in our analysis, given the broad scope and huge diversity of the included papers. Nevertheless, many surveys of the quality of COVID-19 publications already exist.<sup>25-38</sup> Although existing surveys of the quality of COVID-19 research do not cover all subfields of investigation and quality is often difficult to measure precisely, the consistent finding of high prevalence of low quality studies across very different types of study designs suggests that a large portion (perhaps even the large majority) of the immense and rapidly growing COVID-19 literature may be of low quality. Moreover, massive productivity has been described in the pre-COVID era, as affecting researchers across many fields<sup>39</sup> and may be a particular feature for COVID-19 research. Extreme productivity would be worrisome if it sacrifices quality.

The spread of COVID-19 publications in topics and authors traditionally working beyond key relevant disciplines further testifies the great attractiveness of COVID-19 as a field of investigation. The favorable aspect of this expansion is the ability to bring in specialists with expertise in diverse fields, fostering interdisciplinarity. There are situations



where experts in seemingly extremely remote fields (e.g., music or second-language acquisition) may indeed be relevant to contribute to the COVID-19 literature. For example, experts almost in any field may be fully justified to publish on how COVID-19 impacted their work. However, we have anecdotally noted that many published contributions represent situations of epistemic trespassing, where scientists try to address COVID-19 health and medical questions, although they come from unrelated fields and probably lack fundamental subject-matter expertise. In particular, scientists who work with data of any sort, may feel entitled that they can handle, analyze, and interpret COVID-19-related data. We do not wish to single out specific scientists, since this may be a very common problem. Furthermore, the exact magnitude of this problem is difficult to fathom, because it is impossible to know details on whether specific scientists may have additional training/expertise on disciplines beyond what they have published on in their careers. However, in the absence of relevant subject-matter expertise among the authors' teams, the generated research products may be fundamentally flawed.<sup>40</sup> Such fundamentally flawed research may then even pass peer-review, since the same people populate also the ranks of peer-reviewers. Flaws go beyond retractions, which account for <0.1% of published COVID-19 work.<sup>41,42</sup>

Furthermore, there has been a rapid mobilization of funding into COVID-19 research, with some areas, e.g., vaccine development, earmarked for urgent work. According to one analysis, until the end of June 2021, \$21.7 trillion have been committed to various activities related to the COVID-19 response (<https://www.devex.com/news/interactive-who-s-funding-the-covid-19-response-and-what-are-the-priorities-96833>). While the vast majority of these funds are not directly

related to research, some of this funding may eventually also support research products and publications. Direct research activities amount to \$14 billion, plus there are \$173 billion committed to vaccines and treatments and \$237 billion committed to health systems. This funding may have worked as an additional attractor of scientists to this rapidly expanding field.

Certain limitations should be discussed. First, current Scopus data have high precision and recall (98.1% and 94.4%, respectively),<sup>6</sup> but some authors may be split in two or more records and some ID records may include papers from two or more authors. These errors may affect single authors but are unlikely to affect the overall picture obtained in these analyses. Second, field and subfield classification follows a well-known established method, though published items are not precisely categorizable in scientific fields. Third, data on citation impact of COVID-19 authors are too early to appraise with confidence, and the ranking of specific scientists is highly tenuous and can quickly change with relatively small changes in citation counts. The bigger picture of author characteristics rather than specific names should be the focus of these data. Fourth, since many COVID-19 accepted papers are not yet indexed in Scopus, fields with slower publication and indexing may be relatively under-represented in the analyses. Fifth, we used simple terms that are highly specific for the comparative evaluation of other infectious diseases and some relevant papers and authors working on them may have been missed. However, the difference of these other diseases against the explosive nature of COVID-19 authorships is so stark that it would still be very prominent even if some additional authors working on these diseases could be identified. Sixth, given our study design, we cannot tell whether scientists who shift their attention to COVID-19 are

abandoning their prior work, or just working additionally on COVID-19. The pandemic has had direct effects on some types of research, e.g., some investigations were suspended during lockdowns. One would need to have a far longer perspective to examine the long-term impact of potential “covidization” of research upon other scientific disciplines. The vast number of COVID-19 papers have posed an extra strain to the already stretched availability of peer-reviewers in journals. Moreover, an unknown percentage of these papers represent work that required research ethics review, adding another layer of reviewing burden. As the pandemic matures, the science of COVID-19 should also mature. Important remaining questions can be raised about the extent and duration of this “covidization” of research.<sup>2,3</sup> Will scientists continue to flock from different disciplines into COVID-19 research? What consequences might this have for other areas of important investigation, and could non-COVID-19 topics be unfairly neglected? Is the response proportional to the magnitude of the crisis? What is the validity and utility of all these publications? Tracking both the pandemic and the scientific response to the pandemic will be useful to make decisions about planning for the growth, reallocation of interest, and old-versus-new priorities for science and publishing scientists.

Table 1. Subfields with highest rates of authors publishing on COVID-19\*

| Subfield                           | Number of authors | Authors with COVID-19 paper(s) | %      | Number of influential authors | Influential authors with COVID-19 paper(s) | %      |
|------------------------------------|-------------------|--------------------------------|--------|-------------------------------|--------------------------------------------|--------|
| Emergency & Critical Care Medicine | 17,450            | 6,457                          | 37.00% | 523                           | 337                                        | 64.44% |
| Anesthesiology                     | 18,365            | 6,235                          | 33.95% | 669                           | 264                                        | 39.46% |
| Virology                           | 31,279            | 10,069                         | 32.19% | 1,004                         | 562                                        | 55.98% |
| Epidemiology                       | 3,830             | 1,176                          | 30.70% | 143                           | 57                                         | 39.86% |
| Applied Ethics                     | 2,696             | 819                            | 30.38% | 86                            | 51                                         | 59.30% |
| Respiratory System                 | 27,030            | 7,744                          | 28.65% | 930                           | 471                                        | 50.65% |
| General & Internal Medicine        | 54,981            | 15,639                         | 28.44% | 2,593                         | 1,323                                      | 51.02% |
| Allergy                            | 7,147             | 1,978                          | 27.68% | 254                           | 149                                        | 58.66% |
| Medical Informatics                | 6,807             | 1,854                          | 27.24% | 221                           | 113                                        | 51.13% |
| Public Health                      | 31,577            | 8,220                          | 26.03% | 939                           | 434                                        | 46.22% |
| Geriatrics                         | 5,129             | 1,301                          | 25.37% | 172                           | 89                                         | 51.74% |
| Microbiology                       | 80,988            | 18,518                         | 22.87% | 2,447                         | 854                                        | 34.90% |
| Surgery                            | 43,798            | 9,825                          | 22.43% | 1,522                         | 597                                        | 39.22% |
| Cardiovascular System & Hematology | 84,330            | 18,264                         | 21.66% | 2,989                         | 1,288                                      | 43.09% |
| Tropical Medicine                  | 15,754            | 3,298                          | 20.93% | 480                           | 210                                        | 43.75% |

\*the subfields shown are those with the highest proportions of authors with COVID-19 papers among all authors. See Methods for definition of being an influential author.

Table 2. Extremely prolific authors with at least 60 COVID-19 publications indexed in Scopus by August 1, 2021 (not including 8 editors/journalists)

| AUTHOR                        | INSTITUTION                                                                       | COUNTRY        | COVID-19 ITEMS | COVID-19 ITEMS (non pre-prints) | COVID-19 ITEMS Article / Review / Conf P |
|-------------------------------|-----------------------------------------------------------------------------------|----------------|----------------|---------------------------------|------------------------------------------|
| Wiwanitkit, Viroj             | Dr. D.Y. Patil Vidyapeeth Deemed University, Pune                                 | India          | 217            | 217                             | 9                                        |
| Lippi, Giuseppe               | Università degli Studi di Verona                                                  | Italy          | 145            | 139                             | 74                                       |
| Rodriguez-Morales, Alfonso J. | Fundación Universitaria Autónoma de las Américas                                  | Colombia       | 139            | 139                             | 75                                       |
| Dhama, Kuldeep                | Indian Veterinary Research Institute                                              | India          | 118            | 118                             | 99                                       |
| Baden, Lindsey R.             | Brigham and Women's Hospital                                                      | United States  | 93             | 88                              | 14                                       |
| Henry, Brandon Michael        | Cincinnati Children's Hospital Medical Center                                     | United States  | 92             | 87                              | 40                                       |
| Krammer, Florian              | Icahn School of Medicine at Mount Sinai                                           | United States  | 90             | 66                              | 52                                       |
| Rezaei, Nima                  | Research Center for Immunodeficiencies                                            | Iran           | 87             | 85                              | 56                                       |
| Raoult, Didier                | Aix Marseille Université                                                          | France         | 83             | 82                              | 47                                       |
| Baric, Ralph S.               | The University of North Carolina at Chapel Hill                                   | United States  | 82             | 61                              | 58                                       |
| Yuen, Kwok Yung               | The University of Hong Kong Li Ka Shing Faculty of Medicine                       | Hong Kong      | 80             | 80                              | 69                                       |
| Hasan, Syed Shahzad           | University of Huddersfield                                                        | United Kingdom | 80             | 80                              | 26                                       |
| To, Kelvin Kai Wang           | The University of Hong Kong, State Key Laboratory of Emerging Infectious Diseases | China          | 79             | 75                              | 66                                       |
| Kow, Chia Siang               | International Medical University                                                  | Malaysia       | 77             | 77                              | 23                                       |
| Corman, Victor M.             | Charité – Universitätsmedizin Berlin                                              | Germany        | 77             | 58                              | 50                                       |
| Khunti, Kamlesh               | College of Life Sciences                                                          | United Kingdom | 77             | 75                              | 44                                       |
| Bragazzi, Nicola Luigi        | York University                                                                   | Canada         | 76             | 68                              | 60                                       |
| McKee, Martin                 | London School of Hygiene & Tropical Medicine                                      | United Kingdom | 76             | 72                              | 29                                       |
| Lechien, Jerome R.            | Université de Mons                                                                | Belgium        | 76             | 74                              | 50                                       |
| Buonsenso, Danilo             | Università Cattolica del Sacro Cuore, Campus di Roma                              | Italy          | 74             | 71                              | 48                                       |
| Lu, Hongzhou                  | Fudan University                                                                  | China          | 73             | 68                              | 60                                       |
| Greninger, Alexander L.       | Fred Hutchinson Cancer Research Center                                            | United States  | 71             | 59                              | 49                                       |
| Memish, Ziad A.               | Alfaisal University                                                               | Saudi Arabia   | 69             | 68                              | 41                                       |
| Eggo, Rosalind M.             | London School of Hygiene & Tropical Medicine                                      | United Kingdom | 69             | 55                              | 49                                       |
| Hung, Ivan                    | The University of Hong Kong Li Ka Shing Faculty of Medicine                       | Hong Kong      | 68             | 66                              | 57                                       |
| Griffiths, Mark D.            | Nottingham Trent University                                                       | United         | 67             | 66                              | 45                                       |

|                       |                                                             | Kingdom        |    |    |    |
|-----------------------|-------------------------------------------------------------|----------------|----|----|----|
| Koopmans, Marion P.G. | Erasmus MC                                                  | Netherlands    | 66 | 51 | 41 |
| Chan, Jasper Fuk Woo  | The University of Hong Kong Li Ka Shing Faculty of Medicine | China          | 65 | 61 | 58 |
| Tiwari, Ruchi         | College of Veterinary Science India                         | India          | 65 | 65 | 55 |
| Fabbrocini, Gabriella | Università degli Studi di Napoli Federico II                | Italy          | 63 | 63 | 20 |
| Cowling, Benjamin J.  | The University of Hong Kong Li Ka Shing Faculty of Medicine | Hong Kong      | 63 | 52 | 40 |
| Saussez, Sven         | Université de Mons                                          | Belgium        | 63 | 61 | 39 |
| Ohmagari, Norio       | National Center for Global Health and Medicine              | Japan          | 62 | 59 | 46 |
| Joob, Beuy            | Private Academic Practice                                   | Thailand       | 62 | 62 | 3  |
| Finsterer, Josef      | Messerli Institute                                          | Austria        | 62 | 62 | 9  |
| Young, Barnaby Edward | Tan Tock Seng Hospital                                      | Singapore      | 62 | 56 | 47 |
| Bruno, Raffaele       | Università degli Studi di Pavia                             | Italy          | 62 | 57 | 40 |
| Jerome, Keith R.      | Fred Hutchinson Cancer Research Center                      | United States  | 62 | 50 | 41 |
| Harky, Amer           | Liverpool Heart and Chest Hospital                          | United Kingdom | 61 | 61 | 40 |
| Netea, Mihai G.       | Radboud University Nijmegen Medical Centre                  | Netherlands    | 61 | 46 | 38 |
| Zangrillo, A.         | IRCCS San Raffaele Scientific Institute                     | Italy          | 61 | 61 | 41 |
| Plebani, Mario        | Azienda Ospedale Università Padova                          | Italy          | 60 | 54 | 33 |
| Alter, Galit          | Massachusetts Institute of Technology                       | United States  | 60 | 42 | 37 |
| Vaishya, Raju         | Indraprastha Apollo Hospitals                               | India          | 60 | 60 | 37 |
| Lye, David Chien Boon | Tan Tock Seng Hospital                                      | Singapore      | 60 | 55 | 48 |

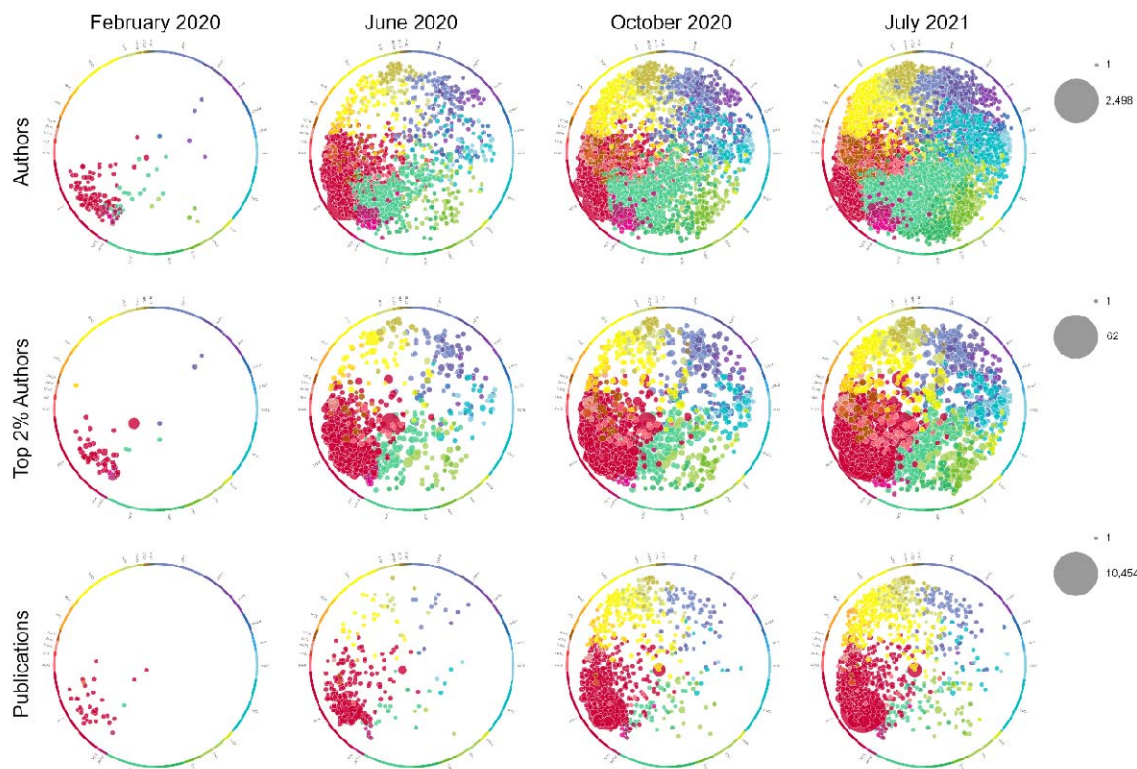

Figure 1 Topics of prominence for COVID-19 authors and publications. The columns represent the progress of the spread at 3 different measuring points: by end of February 2020, end of June 2020, end of October 2020 and end of July 2021. The first row represents the spread of authors of COVID-19 papers. The authors are assigned to their most dominant topic in their career. The data is filtered to include only topics with  $\geq 5$  authors assigned. The second row shows similarly the topics of the top 2% authors by field according to a composite citations indicator. Only topics with 2 or more authors are displayed. The third row displays the spread of COVID-19 publications across topics. The minimum threshold for a topic to be displayed is set to 5 COVID-19 publications. Of note, the author panels show more dispersed distributions than the publication topic panels, suggesting that several authors are moving out of their main career topics to publish on COVID-19.

## Panel A

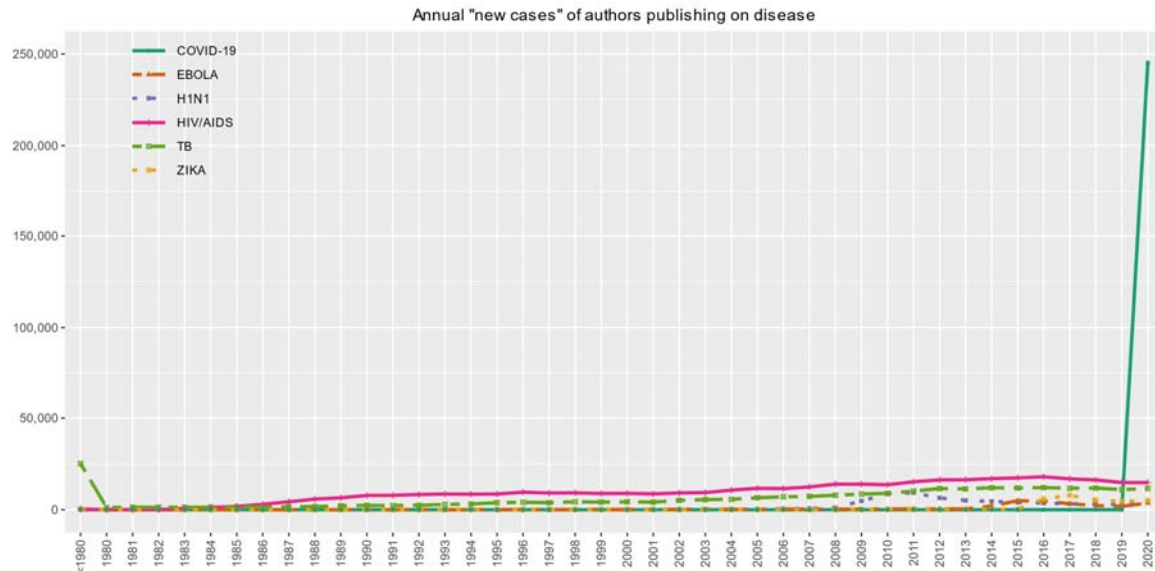

## Panel B

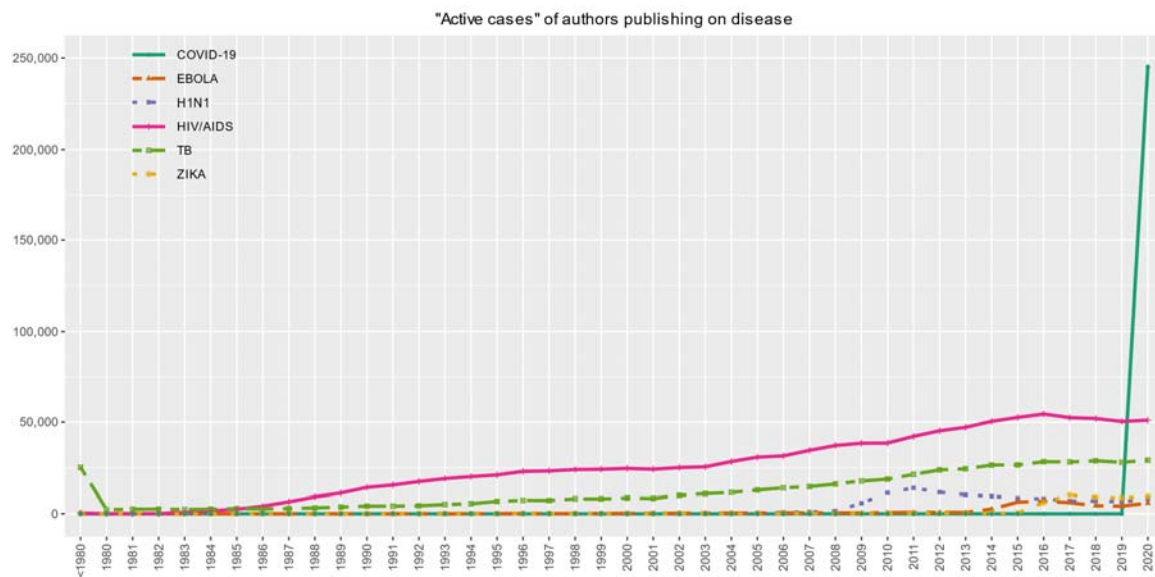

Figure 2. Authors publishing on different infectious diseases and COVID-19 every year among the approximately 8 million authors who have published at least 5 full papers by 2020. Panel A. New author "cases" per year (authors who publish for the first time on the respective topic, without having any previous publications on this same topic in previous years). Panel B. All active author "cases" per year (all authors who publish on the respective topic in each year, regardless of whether they have also published on the same topic in previous years or not).



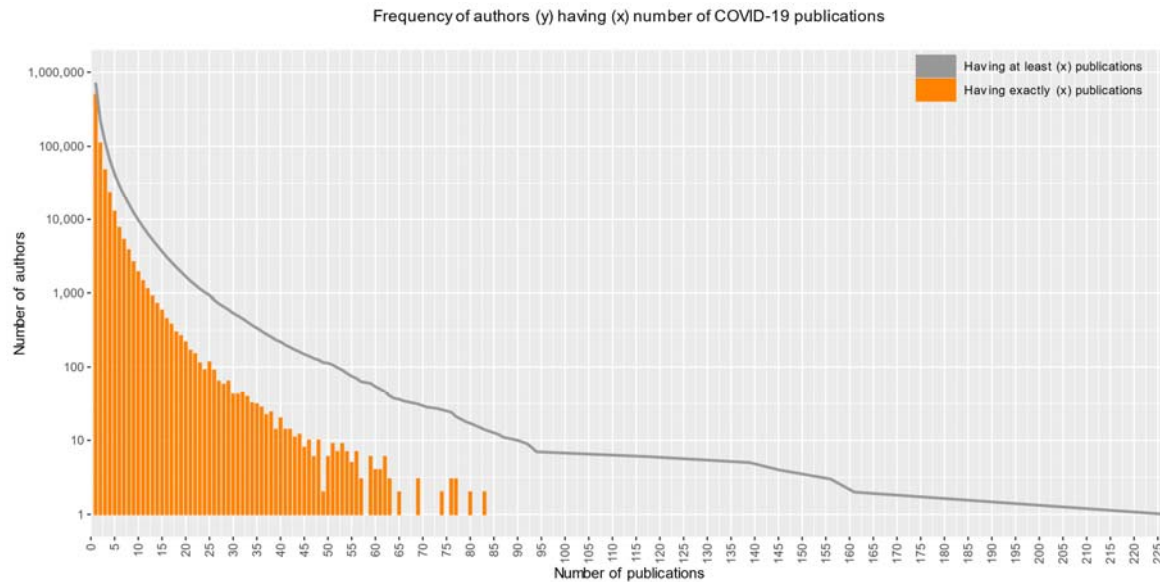

Figure 3. Frequency of authors according to the number of COVID-19 publications among the authors in Scopus with 5 or more publications in total on any topic.

## REFERENCES

1. Else H. How a torrent of COVID science changed research publishing - in seven charts. *Nature*. 2020;588:553.
2. Pai M. Covidization of research: what are the risks? *Nat Med*. 2020;26:1159.
3. Adam D. Scientists fear that 'covidization' is distorting research. *Nature*. 2020;588:381-382.
4. London AJ, Kimmelman J. Against pandemic research exceptionalism. *Science*. 2020;368:476–7.
5. Gai N, Aoyama K, Faraoni D, Goldenberg NM, Levin DN, Maynes JT, McVey MJ, Munshey F, Siddiqui A, Switzer T, Steinberg BE. General medical publications during COVID-19 show increased dissemination despite lower validation. *PLoS One*. 2021;16:e0246427.
6. Baas J, Schotten M, Plume A, Côté G, Karimi R. Scopus as a curated, high-quality bibliometric data source for academic research in quantitative science studies. *Quantitative Science Studies* 2020;1(1):377–386.
7. Baas J, Fennel C. When peer reviewers go rogue—Estimated prevalence of citation manipulation by reviewers based on the citation patterns of 69,000 reviewers. (2019) *Proceedings of the 17th International Conference of the International Society of Scientometrics and Informetrics (ISSI)*. 963–974. Rome, Italy
8. Archambault É, Beauchesne OH, Caruso J. Towards a multilingual, comprehensive and open scientific journal ontology. (2011) *Proceedings of the 13th International*

- Conference of the International Society for Scientometrics and Informetrics (ISSI), 66–77. Durban, South Africa.
9. Zhang X, Zhao J, LeCun Y. Character-level convolutional networks for text classification. (2015) *Advances in neural information processing systems*, 649–657.
  10. Ioannidis JP, Klavans R, Boyack KW. Multiple citation indicators and their composite across scientific disciplines. *PLoS Biol* 2016;14(7):e1002501.
  11. Ioannidis, JPA, Boyack KW, Baas J. Updated science-wide author databases of standardized citation indicators. *PLoS Biol* 2020;18(10) e3000918.
  12. Baas J, Boyack K, Ioannidis JPA. “Data for "Updated science-wide author databases of standardized citation indicators"", Mendeley Data, V2, doi: 10.17632/btchxktyw.2, 2020.
  13. Klavans R, Boyack KW. Toward an objective, reliable and accurate method for measuring research leadership. *Scientometrics* 2010;82(3):539-553.
  14. Klavans R, Boyack KW. Toward a consensus map of science. *Journal of the American Society for Information Science and Technology* 2009;60(3):455-476.
  15. Klavans R, Boyack KW. Research portfolio analysis and topic prominence. *Journal of Informetrics* 2017;11:1158-1174.
  16. Paulson T. Epidemiology: a mortal foe. *Nature* 2013;502:S2–S3.
  17. World Health Organization. *Global Tuberculosis Report 2016*. Geneva: WHO, 2016.
  18. Kupferschmidt K. Preprints bring 'firehose' of outbreak data. *Science* 2020;367(6481):963-964.

19. Gianola S, Jesus TS, Barger S, Castellini G. Characteristics of academic publications, preprints, and registered clinical trials on the COVID-19 pandemic. *PLoS One* 2020;15(10):e0240123.
20. Lachapelle F. COVID-19 preprints and their publishing rate: an improved method. *medRxiv* 2020;doi: <https://doi.org/10.1101/2020.09.04.20188771>.
21. Ioannidis JPA. Coronavirus disease 2019: The harms of exaggerated information and non-evidence-based measures. *Eur J Clin Invest.* 2020 Apr;50(4):e13222.
22. Ahmed N, Shahbaz T, Shamim A, Shafiq Khan K, Hussain SM, Usman A. The COVID-19 Infodemic: A Quantitative Analysis Through Facebook. *Cureus.* 2020;12(11):e11346.
23. Cinelli M, Quattrocioni W, Galeazzi A, Valensise CM, Brugnoti E, Schmidt AL, Zola P, Zollo F, Scala A. The COVID-19 social media infodemic. *Sci Rep.* 2020;10(1):16598.
24. Zarocostas J. How to fight an infodemic. *Lancet.* 2020;395(10225):676.
25. Bagdasarian N, Cross GB, Fisher D. Rapid publications risk the integrity of science in the era of COVID-19. *BMC Med* 2020;18(1):192.
26. Balaphas A, Gkoufa K, Daly MJ, de Valence T. Flattening the curve of new publications on COVID-19. *J Epidemiol Community Health* 2020;74(9):766-767.
27. Khatter A, Naughton M, Dambha-Miller H, Redmond P. Is rapid scientific publication also high quality? Bibliometric analysis of highly disseminated COVID-19 research papers. *Learn Publ.* 2021 Jun 1:10.1002/leap.1403.

28. Wang D, Chen L, Wang L, Hua F, Li J, Li Y, Zhang Y, Fan H, Li W, Clarke M.  
Abstracts for reports of randomised trials of COVID-19 interventions had low quality and high spin. *J Clin Epidemiol*. 2021 Jul 2:S0895-4356(21)00205-5.
29. Abbott R, Bethel A, Rogers M, Whear R, Orr N, Shaw L, Stein K, Thompson Coon J. Characteristics, quality and volume of the first 5 months of the COVID-19 evidence synthesis infodemic: a meta-research study. *BMJ Evid Based Med*. 2021 Jun 3:bmjebm-2021-111710.
30. Li Q, Zhou Q, Xun Y, Liu H, Shi Q, Wang Z, Zhao S, Liu X, Liu E, Fu Z, Chen Y, Luo Z. Quality and consistency of clinical practice guidelines for treating children with COVID-19. *Ann Transl Med*. 2021 Apr;9(8):633.
31. Suchá D, van Hamersvelt RW, van den Hoven AF, de Jong PA, Verkooijen HM. Suboptimal Quality and High Risk of Bias in Diagnostic Test Accuracy Studies at Chest Radiography and CT in the Acute Setting of the COVID-19 Pandemic: A Systematic Review. *Radiol Cardiothorac Imaging*. 2020 Jul 30;2(4):e200342.
32. Kuang Z, Li X, Cai J, Chen Y, Qiu X, Ni X; Evidence-based Traditional and Integrative Medicine Working Group for Public Health Emergency. Calling for improved quality in the registration of traditional Chinese medicine during the public health emergency: a survey of trial registries for COVID-19, H1N1, and SARS. *Trials*. 2021 Mar 5;22(1):188.
33. Li Y, Cao L, Zhang Z, Hou L, Qin Y, Hui X, Li J, Zhao H, Cui G, Cui X, Li R, Lin Q, Li X, Yang K. Reporting and methodological quality of COVID-19 systematic reviews needs to be improved: an evidence mapping. *J Clin Epidemiol*. 2021 Feb 28;135:17-28.

34. Quinn TJ, Burton JK, Carter B, Cooper N, Dwan K, Field R, Freeman SC, Geue C, Hsieh PH, McGill K, Nevill CR, Rana D, Sutton A, Rowan MT, Xin Y. Following the science? Comparison of methodological and reporting quality of covid-19 and other research from the first wave of the pandemic. *BMC Med.* 2021 Feb 23;19(1):46.
35. Luo X, Liu Y, Ren M, Zhang X, Janne E, Lv M, Wang Q, Song Y, Mathew JL, Ahn HS, Lee MS, Chen Y. Consistency of recommendations and methodological quality of guidelines for the diagnosis and treatment of COVID-19. *J Evid Based Med.* 2021 Feb;14(1):40-55.
36. Yang S, Li A, Eshaghpour A, Ivanisevic S, Salopek A, Eikelboom J, Crowther M. Quality of early evidence on the pathogenesis, diagnosis, prognosis and treatment of COVID-19. *BMJ Evid Based Med.* 2020 Sep 30;bmjebm-2020-111499.
37. Nieto I, Navas JF, Vázquez C. The quality of research on mental health related to the COVID-19 pandemic: A note of caution after a systematic review. *Brain Behav Immun Health.* 2020 Aug;7:100123.
38. Alexander PE, Debono VB, Mammen MJ, Iorio A, Aryal K, Deng D, Brocard E, Alhazzani W. COVID-19 coronavirus research has overall low methodological quality thus far: case in point for chloroquine/hydroxychloroquine. *J Clin Epidemiol.* 2020 Jul;123:120-126.
39. Ioannidis JPA, Klavans R, Boyack KW. Thousands of scientists publish a paper every five days. *Nature.* 2018;561(7722):167-169.
40. Bramstedt KA. The carnage of substandard research during the COVID-19 pandemic: a call for quality. *J Med Ethics.* 2020;46(12):803-807.

41. Ledford H, Noorden R. High-profile coronavirus retractions raise concerns about data oversight. *Nature* 2020;582:160.
42. Abritis A, Marcus A, Oransky I. An "alarming" and "exceptionally high" rate of COVID-19 retractions? *Account Res* 2020;11:1-2.
43. ELSEVIER. Elsevier fingerprint engine, <https://www.elsevier.com/solutions/elsevier-fingerprint-engine> (2019).

Supplementary Table 1. Number of authors and number of authors with at least 1 COVID-19-related publication. Data are limited to authors who have published anything that is Scopus-indexed in January 1, 2020 to August 1, 2021 and who have also authored in their entire career at least 5 Scopus-indexed papers that are classified as articles, reviews or conference papers, by the end of July 2021. Of a total of 2,989,810 such authors, 211,894 had at least one published and indexed COVID-19 paper. The Table shows data on 2,987,454 and 211,685 authors who can be classified in a subfield (the most common subfield for the papers that they have published in their career).

| SUBFIELD                                 | FIELD                               | Number of authors | Authors with COVID-19 paper(s) | %     |
|------------------------------------------|-------------------------------------|-------------------|--------------------------------|-------|
| Clinical Medicine                        | Emergency & Critical Care Medicine  | 17450             | 6457                           | 37.0% |
| Clinical Medicine                        | Anesthesiology                      | 18365             | 6235                           | 34.0% |
| Biomedical Research                      | Virology                            | 31279             | 10069                          | 32.2% |
| Public Health & Health Services          | Epidemiology                        | 3830              | 1176                           | 30.7% |
| Philosophy & Theology                    | Applied Ethics                      | 2696              | 819                            | 30.4% |
| Clinical Medicine                        | Respiratory System                  | 27030             | 7744                           | 28.6% |
| Clinical Medicine                        | General & Internal Medicine         | 54981             | 15639                          | 28.4% |
| Clinical Medicine                        | Allergy                             | 7147              | 1978                           | 27.7% |
| Information & Communication Technologies | Medical Informatics                 | 6807              | 1854                           | 27.2% |
| Public Health & Health Services          | Public Health                       | 31577             | 8220                           | 26.0% |
| Clinical Medicine                        | Geriatrics                          | 5129              | 1301                           | 25.4% |
| Biomedical Research                      | Microbiology                        | 80988             | 18518                          | 22.9% |
| Clinical Medicine                        | Surgery                             | 43798             | 9825                           | 22.4% |
| Clinical Medicine                        | Environmental & Occupational Health | 4607              | 1028                           | 22.3% |
| Clinical Medicine                        | Psychiatry                          | 32338             | 7073                           | 21.9% |
| Public Health & Health Services          | Health Policy & Services            | 9442              | 2055                           | 21.8% |
| Clinical Medicine                        | Cardiovascular System & Hematology  | 84330             | 18264                          | 21.7% |
| Clinical Medicine                        | Pediatrics                          | 25686             | 5533                           | 21.5% |
| Clinical Medicine                        | Arthritis & Rheumatology            | 17528             | 3766                           | 21.5% |
| Clinical Medicine                        | General Clinical Medicine           | 5734              | 1224                           | 21.3% |
| Economics & Business                     | Sport, Leisure & Tourism            | 4656              | 983                            | 21.1% |
| Clinical Medicine                        | Tropical Medicine                   | 15754             | 3298                           | 20.9% |
| Public Health & Health Services          | Gerontology                         | 4879              | 1021                           | 20.9% |
| Public Health & Health Services          | Substance Abuse                     | 6762              | 1392                           | 20.6% |
| Public Health & Health Services          | Nursing                             | 19314             | 3899                           | 20.2% |



|                                          |                                           |        |       |       |
|------------------------------------------|-------------------------------------------|--------|-------|-------|
| Clinical Medicine                        | Urology & Nephrology                      | 32902  | 6460  | 19.6% |
| Clinical Medicine                        | Otorhinolaryngology                       | 16486  | 3179  | 19.3% |
| Clinical Medicine                        | Immunology                                | 60939  | 11541 | 18.9% |
| Clinical Medicine                        | Gastroenterology & Hepatology             | 38200  | 7231  | 18.9% |
| Social Sciences                          | Demography                                | 1536   | 285   | 18.6% |
| Enabling & Strategic Technologies        | Bioinformatics                            | 10688  | 1960  | 18.3% |
| Clinical Medicine                        | Dermatology & Venereal Diseases           | 19581  | 3551  | 18.1% |
| Psychology & Cognitive Sciences          | Clinical Psychology                       | 6288   | 1130  | 18.0% |
| Psychology & Cognitive Sciences          | Social Psychology                         | 10349  | 1797  | 17.4% |
| Economics & Business                     | Development Studies                       | 2071   | 348   | 16.8% |
| Social Sciences                          | Social Work                               | 3559   | 598   | 16.8% |
| Clinical Medicine                        | Obstetrics & Reproductive Medicine        | 33013  | 5197  | 15.7% |
| Economics & Business                     | Economics                                 | 23629  | 3712  | 15.7% |
| Social Sciences                          | Political Science & Public Administration | 10721  | 1564  | 14.6% |
| Social Sciences                          | Information & Library Sciences            | 4355   | 622   | 14.3% |
| Clinical Medicine                        | Nuclear Medicine & Medical Imaging        | 44468  | 6295  | 14.2% |
| Clinical Medicine                        | Endocrinology & Metabolism                | 36724  | 5163  | 14.1% |
| Social Sciences                          | Law                                       | 4554   | 631   | 13.9% |
| Communication & Textual Studies          | Communication & Media Studies             | 5888   | 815   | 13.8% |
| Economics & Business                     | Agricultural Economics & Policy           | 3001   | 415   | 13.8% |
| Clinical Medicine                        | Legal & Forensic Medicine                 | 5364   | 740   | 13.8% |
| Social Sciences                          | Family Studies                            | 1456   | 196   | 13.5% |
| Public Health & Health Services          | Rehabilitation                            | 12265  | 1576  | 12.8% |
| Economics & Business                     | Industrial Relations                      | 1048   | 130   | 12.4% |
| Clinical Medicine                        | Complementary & Alternative Medicine      | 6006   | 744   | 12.4% |
| Mathematics & Statistics                 | Statistics & Probability                  | 11867  | 1468  | 12.4% |
| Clinical Medicine                        | Neurology & Neurosurgery                  | 139702 | 17148 | 12.3% |
| Clinical Medicine                        | Oncology & Carcinogenesis                 | 157097 | 18969 | 12.1% |
| Clinical Medicine                        | Ophthalmology & Optometry                 | 27337  | 3297  | 12.1% |
| Clinical Medicine                        | Pharmacology & Pharmacy                   | 48853  | 5885  | 12.0% |
| Economics & Business                     | Business & Management                     | 25629  | 3081  | 12.0% |
| Clinical Medicine                        | Sport Sciences                            | 15621  | 1870  | 12.0% |
| Clinical Medicine                        | Pathology                                 | 8201   | 981   | 12.0% |
| Psychology & Cognitive Sciences          | Developmental & Child Psychology          | 9494   | 1131  | 11.9% |
| Economics & Business                     | Finance                                   | 6730   | 801   | 11.9% |
| Biomedical Research                      | Nutrition & Dietetics                     | 20195  | 2358  | 11.7% |
| Social Sciences                          | Sociology                                 | 4802   | 555   | 11.6% |
| Clinical Medicine                        | Dentistry                                 | 30160  | 3474  | 11.5% |
| Biomedical Research                      | Toxicology                                | 22084  | 2498  | 11.3% |
| Social Sciences                          | Criminology                               | 5429   | 611   | 11.3% |
| Psychology & Cognitive Sciences          | General Psychology & Cognitive Sciences   | 1409   | 158   | 11.2% |
| Built Environment & Design               | Urban & Regional Planning                 | 5627   | 618   | 11.0% |
| Economics & Business                     | Econometrics                              | 757    | 82    | 10.8% |
| Social Sciences                          | Science Studies                           | 2135   | 227   | 10.6% |
| Biomedical Research                      | Biophysics                                | 6854   | 714   | 10.4% |
| Information & Communication Technologies | Information Systems                       | 7648   | 789   | 10.3% |

|                                          |                                             |        |      |       |
|------------------------------------------|---------------------------------------------|--------|------|-------|
| Social Sciences                          | Gender Studies                              | 1060   | 109  | 10.3% |
| Clinical Medicine                        | Orthopedics                                 | 34468  | 3508 | 10.2% |
| Social Sciences                          | International Relations                     | 3396   | 342  | 10.1% |
| Social Sciences                          | Education                                   | 34723  | 3476 | 10.0% |
| Economics & Business                     | Marketing                                   | 6675   | 657  | 9.8%  |
| Biomedical Research                      | Developmental Biology                       | 70598  | 6807 | 9.6%  |
| Social Sciences                          | Geography                                   | 7930   | 747  | 9.4%  |
| Psychology & Cognitive Sciences          | Human Factors                               | 6657   | 581  | 8.7%  |
| Biomedical Research                      | Biochemistry & Molecular Biology            | 60891  | 5305 | 8.7%  |
| Social Sciences                          | Social Sciences Methods                     | 1237   | 107  | 8.6%  |
| Biomedical Research                      | Genetics & Heredity                         | 17049  | 1455 | 8.5%  |
| Chemistry                                | Medicinal & Biomolecular Chemistry          | 38993  | 3317 | 8.5%  |
| Psychology & Cognitive Sciences          | Psychoanalysis                              | 917    | 77   | 8.4%  |
| Psychology & Cognitive Sciences          | Experimental Psychology                     | 15882  | 1309 | 8.2%  |
| Economics & Business                     | Logistics & Transportation                  | 12194  | 978  | 8.0%  |
| Biomedical Research                      | Anatomy & Morphology                        | 2479   | 194  | 7.8%  |
| Economics & Business                     | Accounting                                  | 3027   | 234  | 7.7%  |
| Engineering                              | Operations Research                         | 13389  | 1030 | 7.7%  |
| Historical Studies                       | History of Science, Technology & Medicine   | 904    | 67   | 7.4%  |
| Enabling & Strategic Technologies        | Strategic, Defence & Security Studies       | 8405   | 585  | 7.0%  |
| Information & Communication Technologies | Artificial Intelligence & Image Processing  | 142567 | 9845 | 6.9%  |
| Biomedical Research                      | Physiology                                  | 7784   | 528  | 6.8%  |
| Agriculture, Fisheries & Forestry        | Veterinary Sciences                         | 23531  | 1524 | 6.5%  |
| Historical Studies                       | Anthropology                                | 3897   | 252  | 6.5%  |
| Earth & Environmental Sciences           | Meteorology & Atmospheric Sciences          | 35410  | 2248 | 6.3%  |
| Philosophy & Theology                    | Religions & Theology                        | 3158   | 198  | 6.3%  |
| Earth & Environmental Sciences           | Environmental Sciences                      | 47276  | 2753 | 5.8%  |
| Social Sciences                          | Cultural Studies                            | 2536   | 146  | 5.8%  |
| Mathematics & Statistics                 | Applied Mathematics                         | 9353   | 530  | 5.7%  |
| Engineering                              | Biomedical Engineering                      | 25948  | 1457 | 5.6%  |
| Economics & Business                     | Economic Theory                             | 985    | 55   | 5.6%  |
| Historical Studies                       | History of Social Sciences                  | 920    | 50   | 5.4%  |
| Public Health & Health Services          | Speech-Language Pathology & Audiology       | 4797   | 252  | 5.3%  |
| Visual & Performing Arts                 | Drama & Theater                             | 425    | 22   | 5.2%  |
| Physics & Astronomy                      | Fluids & Plasmas                            | 22311  | 1135 | 5.1%  |
| Biomedical Research                      | Mycology & Parasitology                     | 11507  | 582  | 5.1%  |
| Psychology & Cognitive Sciences          | Behavioral Science & Comparative Psychology | 5137   | 254  | 4.9%  |
| Chemistry                                | Analytical Chemistry                        | 42847  | 2074 | 4.8%  |
| Visual & Performing Arts                 | Folklore                                    | 191    | 9    | 4.7%  |
| Enabling & Strategic Technologies        | Biotechnology                               | 24957  | 1111 | 4.5%  |
| Information & Communication Technologies | Software Engineering                        | 8525   | 375  | 4.4%  |
| Information & Communication Technologies | Distributed Computing                       | 3886   | 167  | 4.3%  |

|                                          |                                       |       |      |      |
|------------------------------------------|---------------------------------------|-------|------|------|
| Built Environment & Design               | Architecture                          | 471   | 20   | 4.2% |
| Biology                                  | Evolutionary Biology                  | 15692 | 664  | 4.2% |
| Built Environment & Design               | Building & Construction               | 16833 | 703  | 4.2% |
| Biology                                  | Ecology                               | 34062 | 1415 | 4.2% |
| Physics & Astronomy                      | Mathematical Physics                  | 2607  | 107  | 4.1% |
| Information & Communication Technologies | Computation Theory & Mathematics      | 10330 | 398  | 3.9% |
| Communication & Textual Studies          | Languages & Linguistics               | 8025  | 301  | 3.8% |
| Physics & Astronomy                      | Chemical Physics                      | 36046 | 1347 | 3.7% |
| Information & Communication Technologies | Networking & Telecommunications       | 79790 | 2943 | 3.7% |
| Mathematics & Statistics                 | Numerical & Computational Mathematics | 7748  | 283  | 3.7% |
| Built Environment & Design               | Design Practice & Management          | 3770  | 130  | 3.4% |
| Engineering                              | Geological & Geomatics Engineering    | 28983 | 990  | 3.4% |
| Philosophy & Theology                    | Philosophy                            | 5071  | 162  | 3.2% |
| Engineering                              | Environmental Engineering             | 22962 | 721  | 3.1% |
| Chemistry                                | Organic Chemistry                     | 56522 | 1724 | 3.1% |
| Agriculture, Fisheries & Forestry        | Food Science                          | 32581 | 966  | 3.0% |
| Visual & Performing Arts                 | Music                                 | 877   | 25   | 2.9% |
| Engineering                              | Industrial Engineering & Automation   | 45450 | 1249 | 2.7% |
| Chemistry                                | General Chemistry                     | 15466 | 419  | 2.7% |
| Enabling & Strategic Technologies        | Nanoscience & Nanotechnology          | 60423 | 1559 | 2.6% |
| Biomedical Research                      | Microscopy                            | 1061  | 26   | 2.5% |
| Historical Studies                       | History                               | 4672  | 112  | 2.4% |
| Communication & Textual Studies          | Literary Studies                      | 5129  | 114  | 2.2% |
| Visual & Performing Arts                 | Art Practice, History & Theory        | 630   | 14   | 2.2% |
| Agriculture, Fisheries & Forestry        | Fisheries                             | 17676 | 371  | 2.1% |
| Agriculture, Fisheries & Forestry        | Dairy & Animal Science                | 28047 | 582  | 2.1% |
| Physics & Astronomy                      | Acoustics                             | 12355 | 256  | 2.1% |
| Engineering                              | Chemical Engineering                  | 27625 | 561  | 2.0% |
| Biology                                  | Plant Biology & Botany                | 72793 | 1445 | 2.0% |
| Enabling & Strategic Technologies        | Energy                                | 99364 | 1939 | 2.0% |
| Information & Communication Technologies | Computer Hardware & Architecture      | 6762  | 131  | 1.9% |
| Biology                                  | Marine Biology & Hydrobiology         | 22647 | 431  | 1.9% |
| Chemistry                                | Inorganic & Nuclear Chemistry         | 24930 | 452  | 1.8% |
| Biology                                  | Ornithology                           | 3069  | 52   | 1.7% |
| Chemistry                                | Polymers                              | 36114 | 610  | 1.7% |
| Physics & Astronomy                      | Nuclear & Particle Physics            | 64338 | 1060 | 1.6% |
| Physics & Astronomy                      | General Physics                       | 28868 | 425  | 1.5% |
| Agriculture, Fisheries & Forestry        | Forestry                              | 13055 | 190  | 1.5% |
| Biology                                  | Zoology                               | 8839  | 126  | 1.4% |
| Engineering                              | Mechanical Engineering & Transports   | 49806 | 703  | 1.4% |
| Mathematics & Statistics                 | General Mathematics                   | 33053 | 445  | 1.3% |
| Biology                                  | Entomology                            | 13927 | 179  | 1.3% |
| Agriculture, Fisheries & Forestry        | Agronomy & Agriculture                | 33649 | 429  | 1.3% |
| Engineering                              | Electrical & Electronic Engineering   | 40279 | 510  | 1.3% |
| Enabling & Strategic Technologies        | Optoelectronics & Photonics           | 33331 | 412  | 1.2% |
| Historical Studies                       | Archaeology                           | 7423  | 90   | 1.2% |

|                                   |                                 |        |      |      |
|-----------------------------------|---------------------------------|--------|------|------|
| Physics & Astronomy               | Optics                          | 31997  | 385  | 1.2% |
| Earth & Environmental Sciences    | Oceanography                    | 7323   | 88   | 1.2% |
| Enabling & Strategic Technologies | Materials                       | 113262 | 1110 | 1.0% |
| Engineering                       | Aerospace & Aeronautics         | 17493  | 163  | 0.9% |
| Engineering                       | Mining & Metallurgy             | 10209  | 95   | 0.9% |
| Physics & Astronomy               | Astronomy & Astrophysics        | 27036  | 251  | 0.9% |
| Physics & Astronomy               | Applied Physics                 | 96801  | 893  | 0.9% |
| Earth & Environmental Sciences    | Geochemistry & Geophysics       | 41248  | 367  | 0.9% |
| Engineering                       | Civil Engineering               | 23294  | 203  | 0.9% |
| Chemistry                         | Physical Chemistry              | 15280  | 126  | 0.8% |
| Agriculture, Fisheries & Forestry | Horticulture                    | 2327   | 19   | 0.8% |
| Historical Studies                | Classics                        | 989    | 8    | 0.8% |
| Earth & Environmental Sciences    | Paleontology                    | 11219  | 63   | 0.6% |
| Earth & Environmental Sciences    | Geology                         | 6440   | 23   | 0.4% |
| Engineering                       | Automobile Design & Engineering | 543    | 1    | 0.2% |

Supplementary Table 2. Number of influential authors and number of them who had at least 1 COVID-19-related publication. The construct is similar to Supplementary Table 1, but is limited to those authors who are the top 2% of their subfield for their career-long work based on a composite citation indicator.

| SUBFIELD                                 | FIELD                               | Number of authors | Authors with COVID-19 paper(s) | %     |
|------------------------------------------|-------------------------------------|-------------------|--------------------------------|-------|
| Clinical Medicine                        | Emergency & Critical Care Medicine  | 523               | 337                            | 64.4% |
| Philosophy & Theology                    | Applied Ethics                      | 83                | 50                             | 60.2% |
| Clinical Medicine                        | Allergy                             | 256               | 151                            | 59.0% |
| Biomedical Research                      | Virology                            | 992               | 549                            | 55.3% |
| Clinical Medicine                        | Geriatrics                          | 169               | 87                             | 51.5% |
| Information & Communication Technologies | Medical Informatics                 | 214               | 108                            | 50.5% |
| Clinical Medicine                        | Respiratory System                  | 933               | 469                            | 50.3% |
| Clinical Medicine                        | General & Internal Medicine         | 2554              | 1277                           | 50.0% |
| Clinical Medicine                        | General Clinical Medicine           | 214               | 103                            | 48.1% |
| Economics & Business                     | Sport, Leisure & Tourism            | 118               | 55                             | 46.6% |
| Public Health & Health Services          | Public Health                       | 924               | 416                            | 45.0% |
| Public Health & Health Services          | Health Policy & Services            | 313               | 138                            | 44.1% |
| Clinical Medicine                        | Arthritis & Rheumatology            | 522               | 230                            | 44.1% |
| Clinical Medicine                        | Cardiovascular System & Hematology  | 2974              | 1304                           | 43.8% |
| Public Health & Health Services          | Gerontology                         | 157               | 66                             | 42.0% |
| Clinical Medicine                        | Tropical Medicine                   | 471               | 197                            | 41.8% |
| Clinical Medicine                        | Gastroenterology & Hepatology       | 1380              | 554                            | 40.1% |
| Public Health & Health Services          | Epidemiology                        | 150               | 60                             | 40.0% |
| Clinical Medicine                        | Surgery                             | 1499              | 579                            | 38.6% |
| Clinical Medicine                        | Immunology                          | 2019              | 771                            | 38.2% |
| Clinical Medicine                        | Psychiatry                          | 1100              | 416                            | 37.8% |
| Clinical Medicine                        | Dermatology & Venereal Diseases     | 678               | 255                            | 37.6% |
| Clinical Medicine                        | Anesthesiology                      | 660               | 248                            | 37.6% |
| Enabling & Strategic Technologies        | Bioinformatics                      | 337               | 124                            | 36.8% |
| Clinical Medicine                        | Pediatrics                          | 865               | 311                            | 36.0% |
| Clinical Medicine                        | Environmental & Occupational Health | 212               | 76                             | 35.8% |
| Public Health & Health Services          | Substance Abuse                     | 221               | 77                             | 34.8% |
| Biomedical Research                      | Microbiology                        | 2430              | 827                            | 34.0% |
| Economics & Business                     | Agricultural Economics & Policy     | 99                | 33                             | 33.3% |

|                                          |                                           |      |      |       |
|------------------------------------------|-------------------------------------------|------|------|-------|
| Psychology & Cognitive Sciences          | Clinical Psychology                       | 249  | 83   | 33.3% |
| Economics & Business                     | Development Studies                       | 64   | 21   | 32.8% |
| Clinical Medicine                        | Urology & Nephrology                      | 1147 | 366  | 31.9% |
| Public Health & Health Services          | Nursing                                   | 1135 | 357  | 31.5% |
| Clinical Medicine                        | Complementary & Alternative Medicine      | 156  | 47   | 30.1% |
| Psychology & Cognitive Sciences          | Social Psychology                         | 298  | 88   | 29.5% |
| Clinical Medicine                        | Otorhinolaryngology                       | 522  | 153  | 29.3% |
| Clinical Medicine                        | Obstetrics & Reproductive Medicine        | 1186 | 345  | 29.1% |
| Clinical Medicine                        | Endocrinology & Metabolism                | 1254 | 364  | 29.0% |
| Public Health & Health Services          | Rehabilitation                            | 357  | 98   | 27.5% |
| Mathematics & Statistics                 | Statistics & Probability                  | 297  | 80   | 26.9% |
| Communication & Textual Studies          | Communication & Media Studies             | 164  | 44   | 26.8% |
| Clinical Medicine                        | Oncology & Carcinogenesis                 | 4188 | 1118 | 26.7% |
| Clinical Medicine                        | Nuclear Medicine & Medical Imaging        | 1453 | 372  | 25.6% |
| Social Sciences                          | Social Work                               | 105  | 26   | 24.8% |
| Clinical Medicine                        | Pathology                                 | 303  | 74   | 24.4% |
| Social Sciences                          | Political Science & Public Administration | 286  | 69   | 24.1% |
| Clinical Medicine                        | Sport Sciences                            | 424  | 101  | 23.8% |
| Social Sciences                          | Geography                                 | 257  | 60   | 23.3% |
| Social Sciences                          | Science Studies                           | 60   | 14   | 23.3% |
| Clinical Medicine                        | Pharmacology & Pharmacy                   | 1570 | 363  | 23.1% |
| Economics & Business                     | Economics                                 | 623  | 144  | 23.1% |
| Clinical Medicine                        | Ophthalmology & Optometry                 | 928  | 211  | 22.7% |
| Social Sciences                          | Family Studies                            | 44   | 10   | 22.7% |
| Chemistry                                | Medicinal & Biomolecular Chemistry        | 1255 | 283  | 22.5% |
| Social Sciences                          | Information & Library Sciences            | 142  | 32   | 22.5% |
| Biomedical Research                      | Nutrition & Dietetics                     | 616  | 138  | 22.4% |
| Clinical Medicine                        | Legal & Forensic Medicine                 | 180  | 40   | 22.2% |
| Information & Communication Technologies | Information Systems                       | 296  | 64   | 21.6% |
| Social Sciences                          | Sociology                                 | 136  | 29   | 21.3% |
| Clinical Medicine                        | Neurology & Neurosurgery                  | 4332 | 923  | 21.3% |
| Psychology & Cognitive Sciences          | Human Factors                             | 226  | 48   | 21.2% |
| Economics & Business                     | Industrial Relations                      | 33   | 7    | 21.2% |
| Economics & Business                     | Business & Management                     | 714  | 150  | 21.0% |
| Psychology & Cognitive Sciences          | Developmental & Child Psychology          | 312  | 64   | 20.5% |
| Clinical Medicine                        | Dentistry                                 | 857  | 172  | 20.1% |
| Economics & Business                     | Logistics & Transportation                | 384  | 77   | 20.1% |
| Social Sciences                          | Demography                                | 40   | 8    | 20.0% |
| Enabling & Strategic Technologies        | Strategic, Defence & Security             | 264  | 52   | 19.7% |

|                                          | Studies                                    |      |     |       |
|------------------------------------------|--------------------------------------------|------|-----|-------|
| Built Environment & Design               | Urban & Regional Planning                  | 155  | 30  | 19.4% |
| Biomedical Research                      | Genetics & Heredity                        | 539  | 102 | 18.9% |
| Biomedical Research                      | Toxicology                                 | 719  | 134 | 18.6% |
| Historical Studies                       | History of Science, Technology & Medicine  | 27   | 5   | 18.5% |
| Biomedical Research                      | Developmental Biology                      | 2051 | 379 | 18.5% |
| Clinical Medicine                        | Orthopedics                                | 894  | 165 | 18.5% |
| Economics & Business                     | Marketing                                  | 198  | 36  | 18.2% |
| Social Sciences                          | Cultural Studies                           | 68   | 12  | 17.6% |
| Psychology & Cognitive Sciences          | General Psychology & Cognitive Sciences    | 47   | 8   | 17.0% |
| Biomedical Research                      | Biophysics                                 | 263  | 44  | 16.7% |
| Psychology & Cognitive Sciences          | Psychoanalysis                             | 30   | 5   | 16.7% |
| Social Sciences                          | Law                                        | 128  | 21  | 16.4% |
| Agriculture, Fisheries & Forestry        | Veterinary Sciences                        | 702  | 115 | 16.4% |
| Economics & Business                     | Economic Theory                            | 19   | 3   | 15.8% |
| Biomedical Research                      | Biochemistry & Molecular Biology           | 2381 | 372 | 15.6% |
| Earth & Environmental Sciences           | Environmental Sciences                     | 1267 | 194 | 15.3% |
| Engineering                              | Operations Research                        | 400  | 61  | 15.3% |
| Social Sciences                          | Criminology                                | 172  | 26  | 15.1% |
| Economics & Business                     | Accounting                                 | 80   | 12  | 15.0% |
| Biomedical Research                      | Physiology                                 | 315  | 47  | 14.9% |
| Information & Communication Technologies | Distributed Computing                      | 149  | 22  | 14.8% |
| Physics & Astronomy                      | Fluids & Plasmas                           | 778  | 113 | 14.5% |
| Earth & Environmental Sciences           | Meteorology & Atmospheric Sciences         | 1048 | 150 | 14.3% |
| Information & Communication Technologies | Artificial Intelligence & Image Processing | 4233 | 599 | 14.2% |
| Biomedical Research                      | Mycology & Parasitology                    | 327  | 46  | 14.1% |
| Chemistry                                | Analytical Chemistry                       | 1500 | 198 | 13.2% |
| Biology                                  | Evolutionary Biology                       | 444  | 57  | 12.8% |
| Economics & Business                     | Finance                                    | 175  | 22  | 12.6% |
| Mathematics & Statistics                 | Applied Mathematics                        | 275  | 34  | 12.4% |
| Social Sciences                          | Education                                  | 1007 | 121 | 12.0% |
| Biomedical Research                      | Anatomy & Morphology                       | 75   | 9   | 12.0% |
| Engineering                              | Biomedical Engineering                     | 972  | 116 | 11.9% |
| Enabling & Strategic Technologies        | Biotechnology                              | 784  | 89  | 11.4% |
| Psychology & Cognitive Sciences          | Experimental Psychology                    | 439  | 49  | 11.2% |
| Economics & Business                     | Econometrics                               | 18   | 2   | 11.1% |
| Historical Studies                       | Anthropology                               | 117  | 13  | 11.1% |
| Social Sciences                          | International Relations                    | 102  | 11  | 10.8% |
| Built Environment & Design               | Building & Construction                    | 484  | 52  | 10.7% |
| Social Sciences                          | Gender Studies                             | 28   | 3   | 10.7% |

|                                          |                                       |      |     |       |
|------------------------------------------|---------------------------------------|------|-----|-------|
| Biology                                  | Ecology                               | 922  | 96  | 10.4% |
| Information & Communication Technologies | Software Engineering                  | 338  | 35  | 10.4% |
| Enabling & Strategic Technologies        | Nanoscience & Nanotechnology          | 1720 | 170 | 9.9%  |
| Information & Communication Technologies | Networking & Telecommunications       | 2748 | 269 | 9.8%  |
| Philosophy & Theology                    | Religions & Theology                  | 98   | 9   | 9.2%  |
| Visual & Performing Arts                 | Drama & Theater                       | 11   | 1   | 9.1%  |
| Public Health & Health Services          | Speech-Language Pathology & Audiology | 150  | 13  | 8.7%  |
| Engineering                              | Industrial Engineering & Automation   | 1562 | 134 | 8.6%  |
| Philosophy & Theology                    | Philosophy                            | 133  | 11  | 8.3%  |
| Communication & Textual Studies          | Languages & Linguistics               | 220  | 18  | 8.2%  |
| Agriculture, Fisheries & Forestry        | Food Science                          | 846  | 63  | 7.4%  |
| Physics & Astronomy                      | Chemical Physics                      | 1286 | 94  | 7.3%  |
| Agriculture, Fisheries & Forestry        | Fisheries                             | 443  | 32  | 7.2%  |
| Historical Studies                       | Archaeology                           | 198  | 14  | 7.1%  |
| Historical Studies                       | History                               | 101  | 7   | 6.9%  |
| Engineering                              | Environmental Engineering             | 751  | 52  | 6.9%  |
| Engineering                              | Geological & Geomatics Engineering    | 815  | 56  | 6.9%  |
| Chemistry                                | Organic Chemistry                     | 2037 | 133 | 6.5%  |
| Built Environment & Design               | Architecture                          | 16   | 1   | 6.3%  |
| Physics & Astronomy                      | Mathematical Physics                  | 83   | 5   | 6.0%  |
| Information & Communication Technologies | Computer Hardware & Architecture      | 288  | 17  | 5.9%  |
| Mathematics & Statistics                 | Numerical & Computational Mathematics | 223  | 13  | 5.8%  |
| Communication & Textual Studies          | Literary Studies                      | 160  | 9   | 5.6%  |
| Enabling & Strategic Technologies        | Energy                                | 3438 | 193 | 5.6%  |
| Engineering                              | Chemical Engineering                  | 941  | 51  | 5.4%  |
| Built Environment & Design               | Design Practice & Management          | 139  | 7   | 5.0%  |
| Biology                                  | Entomology                            | 417  | 21  | 5.0%  |
| Biology                                  | Marine Biology & Hydrobiology         | 621  | 30  | 4.8%  |
| Chemistry                                | Polymers                              | 1371 | 63  | 4.6%  |
| Biology                                  | Ornithology                           | 90   | 4   | 4.4%  |
| Biology                                  | Plant Biology & Botany                | 1951 | 80  | 4.1%  |
| Agriculture, Fisheries & Forestry        | Agronomy & Agriculture                | 835  | 34  | 4.1%  |
| Agriculture, Fisheries & Forestry        | Dairy & Animal Science                | 699  | 28  | 4.0%  |
| Engineering                              | Mechanical Engineering & Transports   | 1512 | 59  | 3.9%  |
| Physics & Astronomy                      | Optics                                | 1080 | 38  | 3.5%  |
| Engineering                              | Electrical & Electronic Engineering   | 1554 | 53  | 3.4%  |
| Physics & Astronomy                      | Acoustics                             | 417  | 14  | 3.4%  |
| Chemistry                                | General Chemistry                     | 479  | 16  | 3.3%  |



|                                          |                                             |      |    |      |
|------------------------------------------|---------------------------------------------|------|----|------|
| Information & Communication Technologies | Computation Theory & Mathematics            | 275  | 9  | 3.3% |
| Chemistry                                | Inorganic & Nuclear Chemistry               | 940  | 30 | 3.2% |
| Mathematics & Statistics                 | General Mathematics                         | 862  | 27 | 3.1% |
| Social Sciences                          | Social Sciences Methods                     | 32   | 1  | 3.1% |
| Physics & Astronomy                      | General Physics                             | 1020 | 31 | 3.0% |
| Visual & Performing Arts                 | Music                                       | 33   | 1  | 3.0% |
| Engineering                              | Civil Engineering                           | 708  | 19 | 2.7% |
| Physics & Astronomy                      | Astronomy & Astrophysics                    | 822  | 22 | 2.7% |
| Agriculture, Fisheries & Forestry        | Forestry                                    | 403  | 10 | 2.5% |
| Enabling & Strategic Technologies        | Optoelectronics & Photonics                 | 1289 | 31 | 2.4% |
| Physics & Astronomy                      | Applied Physics                             | 3718 | 85 | 2.3% |
| Biomedical Research                      | Microscopy                                  | 45   | 1  | 2.2% |
| Enabling & Strategic Technologies        | Materials                                   | 3855 | 77 | 2.0% |
| Biology                                  | Zoology                                     | 207  | 4  | 1.9% |
| Chemistry                                | Physical Chemistry                          | 505  | 9  | 1.8% |
| Psychology & Cognitive Sciences          | Behavioral Science & Comparative Psychology | 169  | 3  | 1.8% |
| Physics & Astronomy                      | Nuclear & Particle Physics                  | 2112 | 35 | 1.7% |
| Engineering                              | Mining & Metallurgy                         | 370  | 6  | 1.6% |
| Earth & Environmental Sciences           | Paleontology                                | 317  | 5  | 1.6% |
| Earth & Environmental Sciences           | Geochemistry & Geophysics                   | 1206 | 19 | 1.6% |
| Engineering                              | Aerospace & Aeronautics                     | 650  | 10 | 1.5% |
| Earth & Environmental Sciences           | Oceanography                                | 201  | 3  | 1.5% |
| Earth & Environmental Sciences           | Geology                                     | 203  | 1  | 0.5% |
| Visual & Performing Arts                 | Art Practice, History & Theory              | 12   | 0  | 0.0% |
| Engineering                              | Automobile Design & Engineering             | 27   | 0  | 0.0% |
| Historical Studies                       | Classics                                    | 27   | 0  | 0.0% |
| Visual & Performing Arts                 | Folklore                                    | 3    | 0  | 0.0% |
| Historical Studies                       | History of Social Sciences                  | 25   | 0  | 0.0% |
| Agriculture, Fisheries & Forestry        | Horticulture                                | 64   | 0  | 0.0% |

Supplementary Table 3. Scientists with highest composite citation indicator based on their COVID-19 publications indexed in Scopus as of August 1, 2021 (in order of ranking per the composite indicator).

| AUTHOR                        | INSTITUTION                                                         | COUNTRY        | MOST COMMON SUBFIELD               | SECOND MOST COMMON SUBFIELD         |
|-------------------------------|---------------------------------------------------------------------|----------------|------------------------------------|-------------------------------------|
| Lu, Hongzhou                  | Fudan University                                                    | China          | Microbiology                       | Oncology & Carcinogenesis           |
| Henry, Brandon Michael        | Cincinnati Children's Hospital Medical Center                       | United States  | Surgery                            | Cardiovascular System & Hematology  |
| Thachil, Jecko                | The University of Manchester                                        | United Kingdom | Cardiovascular System & Hematology | Immunology                          |
| Lippi, Giuseppe               | Università degli Studi di Verona                                    | Italy          | General Clinical Medicine          | Cardiovascular System & Hematology  |
| Krammer, Florian              | Icahn School of Medicine at Mount Sinai                             | United States  | Virology                           | Immunology                          |
| Tang, Ning                    | Tongji Medical College                                              | China          | Cardiovascular System & Hematology | General Clinical Medicine           |
| Elfiky, Abdo A.               | Cairo University                                                    | Egypt          | Virology                           | Biophysics                          |
| Lipsitch, Marc                | Harvard T.H. Chan School of Public Health                           | United States  | Microbiology                       | Epidemiology                        |
| Perlman, Stanley              | University of Iowa                                                  | United States  | Virology                           | Immunology                          |
| Ludvigsson, Jonas F.          | Karolinska Institutet                                               | Sweden         | Gastroenterology & Hepatology      | General & Internal Medicine         |
| Graham, Barney S.             | National Institute of Allergy and Infectious Diseases (NIAID)       | United States  | Immunology                         | Virology                            |
| Yancy, Clyde                  | Northwestern University Feinberg School of Medicine                 | United States  | Cardiovascular System & Hematology | General & Internal Medicine         |
| Ivanov, Dmitry                | Hochschule für Wirtschaft und Recht Berlin                          | Germany        | Operations Research                | Industrial Engineering & Automation |
| Guan, Wei Jie                 | Guangzhou Medical University                                        | China          | Respiratory System                 | Oncology & Carcinogenesis           |
| Jiang, Shibo                  | Fudan University                                                    | China          | Microbiology                       | Developmental Biology               |
| Chan, Jasper Fuk Woo          | The University of Hong Kong Li Ka Shing Faculty of Medicine         | China          | Microbiology                       | Virology                            |
| Baig, Abdul Mannan            | The Aga Khan University                                             | Pakistan       | Neurology & Neurosurgery           | Microbiology                        |
| Cao, Bin                      | China-Japan Friendship Hospital                                     | China          | Microbiology                       | Respiratory System                  |
| Schwartz, David A.            | Medical College of Georgia                                          | United States  | Pathology                          | Microbiology                        |
| Rajkumar, Ravi Philip         | Jawaharlal Institute of Postgraduate Medical Education and Research | India          | Psychiatry                         | Pharmacology & Pharmacy             |
| Rodriguez-Morales, Alfonso J. | Fundación Universitaria Autónoma de las Américas                    | Colombia       | Microbiology                       | Tropical Medicine                   |
| Cook, T. M.                   | Royal United Hospitals Bath NHS Foundation Trust                    | United Kingdom | Anesthesiology                     | General & Internal Medicine         |
| Banerjee, Debanjan            | National Institute of Mental Health and Neuro Sciences              | India          | Psychiatry                         | Experimental Psychology             |
| Iwasaki, A.                   | Yale School of Medicine                                             | United States  | Immunology                         | Developmental Biology               |
| Lee, Sherman A.               | Christopher Newport University                                      | United States  | Social Psychology                  | Clinical Psychology                 |
| Baric, Ralph S.               | The University of North Carolina at Chapel Hill                     | United States  | Virology                           | Microbiology                        |
| Rezaei, Nima                  | Research Center for Immunodeficiencies                              | Iran           | Immunology                         | Allergy                             |
| Heymann, David                | London School of Hygiene & Tropical Medicine                        | United Kingdom | Tropical Medicine                  | Microbiology                        |

|                        |                                                                                   |                |                                    |                                     |
|------------------------|-----------------------------------------------------------------------------------|----------------|------------------------------------|-------------------------------------|
| To, Kelvin Kai Wang    | The University of Hong Kong, State Key Laboratory of Emerging Infectious Diseases | China          | Microbiology                       | Virology                            |
| Greenhalgh, Trisha     | University of Oxford Medical Sciences Division                                    | United Kingdom | General & Internal Medicine        | Public Health                       |
| Huang, Chaolin         | Wuhan Jinyintan Hospital                                                          | China          | Immunology                         | General & Internal Medicine         |
| Gostin, Lawrence O.    | Georgetown Law                                                                    | United States  | Applied Ethics                     | General & Internal Medicine         |
| Ioannidis, John P.A.   | Stanford University School of Medicine                                            | United States  | General & Internal Medicine        | Epidemiology                        |
| Kanne, Jeffrey P.      | University of Wisconsin School of Medicine and Public Health                      | United States  | Nuclear Medicine & Medical Imaging | Respiratory System                  |
| Levi, Marcel           | University College London Hospitals NHS Foundation Trust                          | United Kingdom | Cardiovascular System & Hematology | General & Internal Medicine         |
| Greenberg, Neil        | King's College London                                                             | United Kingdom | Psychiatry                         | Environmental & Occupational Health |
| McKee, Martin          | London School of Hygiene & Tropical Medicine                                      | United Kingdom | General & Internal Medicine        | Public Health                       |
| Wilder-Smith, Annelies | London School of Hygiene & Tropical Medicine                                      | United Kingdom | Tropical Medicine                  | Microbiology                        |
| Koopmans, Marion P.G.  | Erasmus MC                                                                        | Netherlands    | Microbiology                       | Virology                            |
| Coccia, M.             | Consiglio Nazionale delle Ricerche                                                | Italy          | Business & Management              | Science Studies                     |
| D'Antiga, Lorenzo      | Papa Giovanni XXIII Hospital                                                      | Italy          | Gastroenterology & Hepatology      | Surgery                             |
| Zhou, Peng             | Wuhan Institute of Virology Chinese Academy of Sciences                           | China          | Virology                           | Microbiology                        |
| Al-Tawfiq, Jaffar A.   | Johns Hopkins Aramco Healthcare                                                   | Saudi Arabia   | Microbiology                       | Tropical Medicine                   |
| Singhal, Tanu          | Kokilaben Dhirubhai Ambani Hospital and Medical Research Institute                | India          | Pediatrics                         | Microbiology                        |
| Recalcati, Sebastiano  | Azienda Ospedaliera Ospedale Di Lecco                                             | Italy          | Dermatology & Venereal Diseases    | Immunology                          |
| Cowling, Benjamin J.   | The University of Hong Kong Li Ka Shing Faculty of Medicine                       | Hong Kong      | Microbiology                       | General & Internal Medicine         |
| Wu, Joseph T.          | The University of Hong Kong Li Ka Shing Faculty of Medicine                       | Hong Kong      | Microbiology                       | General & Internal Medicine         |
| Kalil, Andre C.        | University of Nebraska Medical Center                                             | United States  | Microbiology                       | Surgery                             |
| Grasselli, Giacomo     | Università degli Studi di Milano                                                  | Italy          | Emergency & Critical Care Medicine | Anesthesiology                      |
| Li, Taisheng           | Peking Union Medical College Hospital                                             | China          | Virology                           | Oncology & Carcinogenesis           |
| Fauci, Anthony S.      | National Institute of Allergy and Infectious Diseases (NIAID)                     | United States  | Immunology                         | General & Internal Medicine         |
| Gurwitz, David         | Tel Aviv University, Sackler Faculty of Medicine                                  | Israel         | Pharmacology & Pharmacy            | Biochemistry & Molecular Biology    |
| Mehra, Mandeep R.      | Brigham and Women's Hospital                                                      | United States  | Cardiovascular System & Hematology | Surgery                             |
| Zhao, Shi              | Chinese University of Hong Kong                                                   | Hong Kong      | Microbiology                       | Tropical Medicine                   |
| Corman, Victor M.      | Charité – Universitätsmedizin Berlin                                              | Germany        | Microbiology                       | Virology                            |
| Young, Barnaby Edward  | Tan Tock Seng Hospital                                                            | Singapore      | Microbiology                       | General & Internal Medicine         |
| Tobias, Aurelio        | CSIC - Instituto de Diagnostico Ambiental y Estudios del Agua (IDAEA)             | Spain          | Toxicology                         | Environmental Sciences              |
| Atangana, A.           | University of the Free State                                                      | South Africa   | Applied Mathematics                | Mathematical Physics                |
| Plebani, Mario         | Azienda Ospedale Università Padova                                                | Italy          | General Clinical Medicine          | Cardiovascular System & Hematology  |
| Pal, Rimesh            | Postgraduate Institute of Medical Education & Research, Chandigarh                | India          | Endocrinology & Metabolism         | General & Internal Medicine         |
| Hoffmann, Markus       | Deutsches Primatenzentrum                                                         | Germany        | Virology                           | Developmental Biology               |

|                       |                                                                    |                   |                                     |                                       |
|-----------------------|--------------------------------------------------------------------|-------------------|-------------------------------------|---------------------------------------|
| Buonsenso, Danilo     | Università Cattolica del Sacro Cuore, Campus di Roma               | Italy             | Pediatrics                          | Nuclear Medicine & Medical Imaging    |
| Gautret, Philippe     | Aix Marseille Université                                           | France            | Microbiology                        | Tropical Medicine                     |
| Leung, Gabriel M.     | The University of Hong Kong Li Ka Shing Faculty of Medicine        | Hong Kong         | Epidemiology                        | General & Internal Medicine           |
| Singh, Awadhesh Kumar | G.D Hospital & Diabetes Institute                                  | India             | Endocrinology & Metabolism          | Pharmacology & Pharmacy               |
| Taylor, Steven        | The University of British Columbia                                 | Canada            | Clinical Psychology                 | Psychiatry                            |
| Zhou, Fei             | China-Japan Friendship Hospital                                    | China             | Respiratory System                  | Microbiology                          |
| Misra, Anoop          | Diabetes Foundation (India), New Delhi                             | India             | Endocrinology & Metabolism          | Nutrition & Dietetics                 |
| Koh, David            | Universiti Brunei Darussalam                                       | Brunei Darussalam | Environmental & Occupational Health | General & Internal Medicine           |
| Bourouiba, Lydia      | Massachusetts Institute of Technology                              | United States     | Fluids & Plasmas                    | Evolutionary Biology                  |
| Becker, Richard C.    | University of Cincinnati College of Medicine                       | United States     | Cardiovascular System & Hematology  | General & Internal Medicine           |
| Angus, Derek C.       | University of Pittsburgh School of Medicine                        | United States     | General & Internal Medicine         | Emergency & Critical Care Medicine    |
| Liang, Wenhua         | Guangzhou Medical University                                       | China             | Oncology & Carcinogenesis           | Surgery                               |
| Phelan, Alexandra L.  | Georgetown University                                              | United States     | General & Internal Medicine         | Applied Ethics                        |
| Hung, Ivan            | The University of Hong Kong Li Ka Shing Faculty of Medicine        | Hong Kong         | Microbiology                        | Gastroenterology & Hepatology         |
| Munster, Vincent J.   | NIAID Rocky Mountain Laboratories                                  | United States     | Virology                            | Microbiology                          |
| Lai, Chih Cheng       | Veterans General Hospital-Kaohsiung Taiwan                         | Taiwan            | Microbiology                        | Arthritis & Rheumatology              |
| Klompas, Michael      | Brigham and Women's Hospital                                       | United States     | Epidemiology                        | Microbiology                          |
| Tandon, Rajiv         | Western Michigan University Homer Stryker M.D. School of Medicine  | United States     | Psychiatry                          | Neurology & Neurosurgery              |
| Wiwanitkit, Viroj     | Dr. D.Y. Patil Vidyapeeth Deemed University, Pune                  | India             | Tropical Medicine                   | General & Internal Medicine           |
| Sher, Leo             | Icahn School of Medicine at Mount Sinai                            | United States     | Psychiatry                          | Public Health                         |
| Goodell, John W.      | University of Akron                                                | United States     | Finance                             | Business & Management                 |
| Lechien, Jerome R.    | Université de Mons                                                 | Belgium           | Otorhinolaryngology                 | Speech-Language Pathology & Audiology |
| Wang, Chen            | Chinese Academy of Medical Sciences & Peking Union Medical College | China             | Respiratory System                  | General & Internal Medicine           |
| Kucharski, Adam J.    | London School of Hygiene & Tropical Medicine                       | United Kingdom    | Microbiology                        | General & Internal Medicine           |
| Xiang, Yu Tao         | University of Macau                                                | China             | Psychiatry                          | Nursing                               |
| Guarner, Jeannette    | Emory University School of Medicine                                | United States     | Pathology                           | Microbiology                          |
| Ho, Cyrus S.H.        | Yong Loo Lin School of Medicine                                    | Singapore         | Toxicology                          | Psychiatry                            |
| Huynh, Toan Luu Duc   | WHU - Otto Beisheim School of Management                           | Germany           | Economics                           | Finance                               |
| Larson, Heidi J.      | London School of Hygiene & Tropical Medicine                       | United Kingdom    | Virology                            | Public Health                         |
| Brodin, Petter        | Karolinska Institutet                                              | Sweden            | Immunology                          | Developmental Biology                 |
| Raoult, Didier        | Aix Marseille Université                                           | France            | Microbiology                        | Tropical Medicine                     |
| Curigliano, Giuseppe  | Università degli Studi di Milano                                   | Italy             | Oncology & Carcinogenesis           | Pharmacology & Pharmacy               |
| Galea, Sandro         | School of Public Health                                            | United States     | Public Health                       | Psychiatry                            |

|                        |                                                                                      |                |                                    |                                    |
|------------------------|--------------------------------------------------------------------------------------|----------------|------------------------------------|------------------------------------|
| Ratten, Vanessa        | La Trobe Business School                                                             | Australia      | Business & Management              | Marketing                          |
| Zhong, Nan shan        | Guangzhou Medical University                                                         | China          | Respiratory System                 | Oncology & Carcinogenesis          |
| Mukhtar, Sonia         | University of Management and Technology Lahore                                       | Pakistan       | Gender Studies                     | Sociology                          |
| Colson, Philippe       | Aix Marseille Université                                                             | France         | Microbiology                       | Virology                           |
| Nkengasong, John N.    | Africa Centres for Disease Control and Prevention                                    | Ethiopia       | Virology                           | Microbiology                       |
| Dhama, Kuldeep         | Indian Veterinary Research Institute                                                 | India          | Dairy & Animal Science             | Veterinary Sciences                |
| Liu, Yingxia           | Second Affiliated Hospital of Southern University of Science and Technology          | China          | Virology                           | Microbiology                       |
| Yuen, Kwok Yung        | The University of Hong Kong Li Ka Shing Faculty of Medicine                          | Hong Kong      | Microbiology                       | Virology                           |
| Naveen, Vankadari      | Faculty of Medicine, Nursing and Health Sciences                                     | Australia      | Biochemistry & Molecular Biology   | Physical Chemistry                 |
| Cheng, V. C.C.         | Queen Mary Hospital Hong Kong                                                        | Hong Kong      | Microbiology                       | Epidemiology                       |
| Khunti, Kamlesh        | College of Life Sciences                                                             | United Kingdom | Endocrinology & Metabolism         | General & Internal Medicine        |
| Wu, Zun You            | Chinese Center for Disease Control and Prevention                                    | China          | Public Health                      | Virology                           |
| Hui, David S.C.        | Chinese University of Hong Kong                                                      | Hong Kong      | Respiratory System                 | Microbiology                       |
| Liu, Jia               | Tongji Medical College                                                               | China          | Virology                           | Immunology                         |
| Gautam, Sneha          | Karunya Institute of Technology and Sciences                                         | India          | Environmental Sciences             | Ecology                            |
| Rubin, G. James        | King's College London                                                                | United Kingdom | Psychiatry                         | Public Health                      |
| Vaishya, Raju          | Indraprastha Apollo Hospitals                                                        | India          | Orthopedics                        | General & Internal Medicine        |
| Kraemer, Moritz U.G.   | University of Oxford                                                                 | United Kingdom | Tropical Medicine                  | Microbiology                       |
| Tang, Julian W.        | University of Leicester                                                              | United Kingdom | Microbiology                       | Virology                           |
| Xiong, Yong            | Zhongnan Hospital of Wuhan University                                                | China          | Microbiology                       | Virology                           |
| Tobin, Martin J.       | Loyola University of Chicago                                                         | United States  | Respiratory System                 | Emergency & Critical Care Medicine |
| Phan, Tung             | University of Pittsburgh Medical Center                                              | United States  | Virology                           | Microbiology                       |
| Wang, Yeming           | China-Japan Friendship Hospital                                                      | China          | Microbiology                       | General & Internal Medicine        |
| Bikdeli, Behnood       | Cardiovascular Research Foundation                                                   | United States  | Cardiovascular System & Hematology | General & Internal Medicine        |
| Mamun, Md Abdullah Al  | Centre for Health Innovation, Networking, Training, Action and Research - Bangladesh | Bangladesh     | Psychiatry                         | Nursing                            |
| Connors, Jean M.       | Harvard Medical School                                                               | United States  | Cardiovascular System & Hematology | Immunology                         |
| Volkow, Nora D.        | National Institute on Alcohol Abuse and Alcoholism (NIAAA)                           | United States  | Neurology & Neurosurgery           | Psychiatry                         |
| Liu, Lei               | Second Affiliated Hospital of Southern University of Science and Technology          | China          | Microbiology                       | Immunology                         |
| Wichmann, Dominic      | Universitätsklinikum Hamburg-Eppendorf                                               | Germany        | Emergency & Critical Care Medicine | Microbiology                       |
| Wang, Xinghuan         | Zhongnan Hospital of Wuhan University                                                | China          | Oncology & Carcinogenesis          | Biochemistry & Molecular Biology   |
| Asmundson, Gordon J.G. | University of Regina                                                                 | Canada         | Clinical Psychology                | Psychiatry                         |
| Baden, Lindsey R.      | Brigham and Women's Hospital                                                         | United States  | Microbiology                       | General & Internal Medicine        |
| Hotez, Peter J.        | Baylor College of Medicine                                                           | United States  | Tropical Medicine                  | Mycology & Parasitology            |
| van Vugt, Michèle      | Universiteit van Amsterdam                                                           | Netherlands    | Tropical Medicine                  | Microbiology                       |

|                        |                                                                                                   |                |                                    |                                    |
|------------------------|---------------------------------------------------------------------------------------------------|----------------|------------------------------------|------------------------------------|
| Walls, Alexandra C.    | University of Washington                                                                          | United States  | Developmental Biology              | Biophysics                         |
| Wrapp, Daniel          | The University of Texas at Austin                                                                 | United States  | Virology                           | Developmental Biology              |
| Galanakis, Charis M.   | Galanakis Laboratories                                                                            | Greece         | Food Science                       | Biotechnology                      |
| Brufsky, Adam          | UPMC Hillman Cancer Center                                                                        | United States  | Oncology & Carcinogenesis          | Pathology                          |
| Shi, Yuan              | Children's Hospital of Chongqing Medical University                                               | China          | Pediatrics                         | Neurology & Neurosurgery           |
| Poland, Gregory A.     | Mayo Clinic                                                                                       | United States  | Virology                           | Immunology                         |
| van Doremalen, Neeltje | NIAID Rocky Mountain Laboratories                                                                 | United States  | Virology                           | Microbiology                       |
| Du, Ronghui            | Wuhan First Hospital                                                                              | China          | Respiratory System                 | Immunology                         |
| Hopkins, Claire        | Guy's and St Thomas' NHS Foundation Trust                                                         | United Kingdom | Otorhinolaryngology                | General & Internal Medicine        |
| Bragazzi, Nicola Luigi | York University                                                                                   | Canada         | General & Internal Medicine        | Toxicology                         |
| Wang, Fusheng          | General Hospital of People's Liberation Army                                                      | China          | Gastroenterology & Hepatology      | Immunology                         |
| Mizumoto, Kenji        | Graduate School of Advanced Integrated Studies in Human Survivability                             | Japan          | Microbiology                       | Bioinformatics                     |
| Kim, Jin Yong          | Incheon Medical Center                                                                            | South Korea    | General & Internal Medicine        | Microbiology                       |
| Zhang, Wei             | Beijing Ditan Hospital Capital Medical University                                                 | China          | Virology                           | Microbiology                       |
| Ren, Lili              | Institute of Pathogen Biology, Chinese Academy of Medical Sciences & Peking Union Medical College | China          | Microbiology                       | Virology                           |
| Xu, Zhe                | General Hospital of People's Liberation Army                                                      | China          | Microbiology                       | Oncology & Carcinogenesis          |
| Wang, Dawei            | Zhongnan Hospital of Wuhan University                                                             | China          | Emergency & Critical Care Medicine | General & Internal Medicine        |
| Carr, Anitra C.        | University of Otago, Christchurch                                                                 | New Zealand    | Nutrition & Dietetics              | Biochemistry & Molecular Biology   |
| Iacobellis, Gianluca   | University of Miami Leonard M. Miller School of Medicine                                          | United States  | Endocrinology & Metabolism         | Cardiovascular System & Hematology |
| Sohrabi, Catrin        | The Royal London Hospital                                                                         | United Kingdom | Surgery                            | General & Internal Medicine        |
| Chung, Michael         | Icahn School of Medicine at Mount Sinai                                                           | United States  | Nuclear Medicine & Medical Imaging | Respiratory System                 |
| Zhu, Na                | Chinese Center for Disease Control and Prevention                                                 | China          | Virology                           | Microbiology                       |
| Leung, Kathy           | The University of Hong Kong Li Ka Shing Faculty of Medicine                                       | Hong Kong      | Microbiology                       | General & Internal Medicine        |
| Lu, Roujian            | Chinese Center for Disease Control and Prevention                                                 | China          | Virology                           | Microbiology                       |
| Shi, Heshui            | Tongji Medical College                                                                            | China          | Nuclear Medicine & Medical Imaging | Oncology & Carcinogenesis          |
| Horby, Peter W.        | Nuffield Department of Medicine                                                                   | United Kingdom | Microbiology                       | General & Internal Medicine        |
| Wang, Wenling          | Chinese Center for Disease Control and Prevention                                                 | China          | Virology                           | Microbiology                       |
| Ashraf, Badar Nadeem   | Jiangxi University of Finance and EcoNomics                                                       | China          | Finance                            | Economics                          |
| Varga, Zsuzsanna       | UniversitätsSpital Zurich                                                                         | Switzerland    | Oncology & Carcinogenesis          | Pathology                          |
| Lu, Xiaoxia            | Tongji Medical College                                                                            | China          | Pediatrics                         | Neurology & Neurosurgery           |
| Stebbing, Justin       | Imperial College London                                                                           | United Kingdom | Oncology & Carcinogenesis          | Immunology                         |
| Asadi-Pooya, Ali A.    | Shiraz University of Medical Sciences                                                             | United         | Neurology &                        | General & Internal Medicine        |

|                          |                                                             |                |                                    |                                    |
|--------------------------|-------------------------------------------------------------|----------------|------------------------------------|------------------------------------|
|                          |                                                             | States         | Neurosurgery                       |                                    |
| Mehta, Puja              | University College London Hospitals<br>NHS Foundation Trust | United Kingdom | Arthritis & Rheumatology           | Immunology                         |
| Qiao, Jie                | Peking University Third Hospital                            | China          | Obstetrics & Reproductive Medicine | Oncology & Carcinogenesis          |
| Lee, Vernon J.M.         | Ministry of Health, Government of Singapore                 | Singapore      | Microbiology                       | Virology                           |
| Hellewell, Joel          | London School of Hygiene & Tropical Medicine                | United Kingdom | General & Internal Medicine        | Microbiology                       |
| Casadevall, Arturo       | Johns Hopkins Bloomberg School of Public Health             | United States  | Microbiology                       | Immunology                         |
| Amanat, Fatima           | Icahn School of Medicine at Mount Sinai                     | United States  | Microbiology                       | Immunology                         |
| Morawska, L.             | Queensland University of Technology                         | Australia      | Environmental Sciences             | Meteorology & Atmospheric Sciences |
| Petersen, Eskild         | Aarhus Universitet                                          | Denmark        | Microbiology                       | Tropical Medicine                  |
| de Wit, Emmie            | NIAID Rocky Mountain Laboratories                           | United States  | Virology                           | Microbiology                       |
| del Rio, Carlos          | Emory University                                            | United States  | Virology                           | Public Health                      |
| Poon, Leo L.M.           | The University of Hong Kong Li Ka Shing Faculty of Medicine | Hong Kong      | Virology                           | Microbiology                       |
| Helms, Julie             | Les Hôpitaux Universitaires de Strasbourg                   | France         | Emergency & Critical Care Medicine | Neurology & Neurosurgery           |
| Coulthard, P.            | ?Queen Mary University London                               | United Kingdom | Dentistry                          | General & Internal Medicine        |
| Griffiths, Mark D.       | Nottingham Trent University                                 | United Kingdom | Substance Abuse                    | Psychiatry                         |
| Brooks, Samantha K.      | King's College London                                       | United Kingdom | Psychiatry                         | General & Internal Medicine        |
| Bhopal, Raj S.           | Edinburgh Medical School                                    | United Kingdom | Public Health                      | General & Internal Medicine        |
| Zangrillo, A.            | IRCCS San Raffaele Scientific Institute                     | Italy          | Anesthesiology                     | Emergency & Critical Care Medicine |
| Sette, Alessandro        | La Jolla Institute for Immunology                           | United States  | Immunology                         | Virology                           |
| Lescure, François Xavier | Hôpital Bichat-Claude-Bernard AP-HP                         | France         | Microbiology                       | General & Internal Medicine        |
| Gössling, Stefan         | Linnaeus University, Kalmar                                 | Sweden         | Sport, Leisure & Tourism           | Logistics & Transportation         |
| Chowell, Gerardo         | Georgia State University                                    | United States  | Microbiology                       | Bioinformatics                     |
| Zhang, Sheng             | Shanghai Jiao Tong University School of Medicine            | China          | Oncology & Carcinogenesis          | Microbiology                       |
| Yang, Xiaobo             | Tongji Medical College                                      | China          | Emergency & Critical Care Medicine | Immunology                         |
| Pranata, Raymond         | Universitas Pelita Harapan                                  | Indonesia      | Cardiovascular System & Hematology | Endocrinology & Metabolism         |
| Chen, Nanshan            | Wuhan Jinyintan Hospital                                    | China          | General & Internal Medicine        | Oncology & Carcinogenesis          |
| Peiris, Malik            | HKU-Pasteur Research Pole                                   | Hong Kong      | Microbiology                       | Virology                           |
| Leung, Char              | Deakin University                                           | Australia      | Virology                           | Finance                            |
| Ali, Nurshad             | Shahjalal University of Science and Technology              | Bangladesh     | Toxicology                         | Microbiology                       |
| Topol, Eric              | Scripps Translational Science Institute                     | United States  | Cardiovascular System & Hematology | General & Internal Medicine        |
| Chen, Yu                 | Wuhan University                                            | China          | Virology                           | Developmental Biology              |
| Zumla, Alimuddin         | University College London                                   | United Kingdom | Microbiology                       | General & Internal Medicine        |
| Iba, Toshiaki            | Juntendo University Graduate School of Medicine             | Japan          | Cardiovascular System & Hematology | Emergency & Critical Care Medicine |

|                            |                                                                                                   |                |                                    |                                    |
|----------------------------|---------------------------------------------------------------------------------------------------|----------------|------------------------------------|------------------------------------|
| Levin, Michael             | Imperial College London                                                                           | United Kingdom | Pediatrics                         | Microbiology                       |
| Edmunds, W. John           | London School of Hygiene & Tropical Medicine                                                      | United Kingdom | Virology                           | Microbiology                       |
| Zhang, Chao                | General Hospital of People's Liberation Army                                                      | China          | Immunology                         | Microbiology                       |
| Conti, Pio                 | University of G. d'Annunzio Chieti and Pescara                                                    | Italy          | Immunology                         | Biochemistry & Molecular Biology   |
| Ogen, Yaron                | Tel Aviv University                                                                               | Israel         | Agronomy & Agriculture             | Geological & Geomatics Engineering |
| Wölfel, Roman              | Institut für Mikrobiologie der Bundeswehr                                                         | Germany        | Microbiology                       | Virology                           |
| Yao, Hao                   | Harvard T.H. Chan School of Public Health                                                         | United States  | Health Policy & Services           | Psychiatry                         |
| Neurath, Markus F.         | Universitätsklinikum Erlangen                                                                     | Germany        | Gastroenterology & Hepatology      | Immunology                         |
| Davies, Nicholas G.        | London School of Hygiene & Tropical Medicine                                                      | United Kingdom | General & Internal Medicine        | Microbiology                       |
| Cao, Xuetao                | Nankai University                                                                                 | China          | Immunology                         | Oncology & Carcinogenesis          |
| Hobbs, Jill E.             | University of Saskatchewan                                                                        | Canada         | Agricultural Economics & Policy    | Business & Management              |
| Geldsetzer, Pascal         | Universität Heidelberg                                                                            | Germany        | General & Internal Medicine        | Virology                           |
| Guo, Li                    | Institute of Pathogen Biology, Chinese Academy of Medical Sciences & Peking Union Medical College | China          | Virology                           | Microbiology                       |
| Higgins-Desbiolles, Freya  | University of South Australia                                                                     | Australia      | Sport, Leisure & Tourism           | International Relations            |
| Emanuel, Ezekiel J.        | University of Pennsylvania Perelman School of Medicine                                            | United States  | General & Internal Medicine        | Applied Ethics                     |
| Bontempi, Elza             | Università degli Studi di Brescia                                                                 | Italy          | Applied Physics                    | Materials                          |
| Ceriello, Antonio          | IRCCS Multimedica                                                                                 | Italy          | Endocrinology & Metabolism         | Cardiovascular System & Hematology |
| Lam, Tommy T.Y.            | The University of Hong Kong, State Key Laboratory of Emerging Infectious Diseases                 | Hong Kong      | Virology                           | Microbiology                       |
| Mauvais-Jarvis, Franck     | Tulane University School of Medicine                                                              | United States  | Endocrinology & Metabolism         | Developmental Biology              |
| Grech, Victor              | Mater Dei Hospital                                                                                | Malta          | Pediatrics                         | General & Internal Medicine        |
| Paniz-Mondolfi, Alberto E. | Icahn School of Medicine at Mount Sinai                                                           | United States  | Microbiology                       | Virology                           |
| Bauchner, Howard           | Journal of American Medical Association                                                           |                | Pediatrics                         | General & Internal Medicine        |
| Sanchis-Gomar, Fabian      | Universitat de València                                                                           | Spain          | Cardiovascular System & Hematology | General Clinical Medicine          |
| Wang, Cuiyan               | HuaiBei Coal Industry Teachers College                                                            | China          | Toxicology                         | Psychiatry                         |
| Netea, Mihai G.            | Radboud University Nijmegen Medical Centre                                                        | Netherlands    | Immunology                         | Microbiology                       |
| Klok, Frederikus A.        | Leiden University Medical Center – LUMC                                                           | Netherlands    | Cardiovascular System & Hematology | General & Internal Medicine        |
| Khan, Suliman              | Zhengzhou University                                                                              | China          | Microbiology                       | Plant Biology & Botany             |
| Montemurro, Nicola         | Università di Pisa                                                                                | Italy          | Neurology & Neurosurgery           | Dentistry                          |
| Ronco, Claudio             | Ospedale San Bortolo                                                                              | Italy          | Urology & Nephrology               | Emergency & Critical Care Medicine |
| Drosten, Christian         | Charité – Universitätsmedizin Berlin                                                              | Germany        | Microbiology                       | Virology                           |
| Ling, Yun                  | Fudan University                                                                                  | China          | Microbiology                       | Immunology                         |
| Meo, Sultan Ayoub          | King Saud University Medical College                                                              | Saudi Arabia   | General & Internal Medicine        | Gastroenterology & Hepatology      |
| Wang, Manli                | Wuhan Institute of Virology Chinese                                                               | China          | Virology                           | Nanoscience &                      |



|                              |                                                                 |                |                                            |                                    |
|------------------------------|-----------------------------------------------------------------|----------------|--------------------------------------------|------------------------------------|
|                              | Academy of Sciences                                             |                |                                            | Nanotechnology                     |
| Arabi, Yaseen                | King Saud bin Abdulaziz University for Health Sciences          | Saudi Arabia   | Emergency & Critical Care Medicine         | General & Internal Medicine        |
| Zhou, Wenhao                 | Children's Hospital of Fudan University                         | China          | Pediatrics                                 | Neurology & Neurosurgery           |
| Vabret, Nicolas              | Icahn School of Medicine at Mount Sinai                         | United States  | Immunology                                 | Virology                           |
| Murthy, Srinivas             | The University of British Columbia                              | Canada         | General & Internal Medicine                | Emergency & Critical Care Medicine |
| Joob, Beuy                   | Private Academic Practice                                       | Thailand       | Tropical Medicine                          | Oncology & Carcinogenesis          |
| Buckee, Caroline O.          | Harvard T.H. Chan School of Public Health                       | United States  | Microbiology                               | Developmental Biology              |
| Bansal, Manish               | Medanta Hospital                                                | India          | Cardiovascular System & Hematology         | General & Internal Medicine        |
| Prem, Kiesha                 | London School of Hygiene & Tropical Medicine                    | United Kingdom | General & Internal Medicine                | Microbiology                       |
| Mason, Robert J.             | National Jewish Health                                          | United States  | Respiratory System                         | Biochemistry & Molecular Biology   |
| Binnicker, Matthew J.        | Mayo Clinic                                                     | United States  | Microbiology                               | Immunology                         |
| MacIntyre, C. Raina          | The Kirby Institute                                             | Australia      | Microbiology                               | Virology                           |
| Baud, David                  | Centre Hospitalier Universitaire Vaudois                        | Switzerland    | Obstetrics & Reproductive Medicine         | Microbiology                       |
| Rasmussen, Sonja A.          | University of Florida College of Medicine                       | United States  | Genetics & Heredity                        | Obstetrics & Reproductive Medicine |
| Santosh, Kc                  | University of South Dakota                                      | United States  | Artificial Intelligence & Image Processing | Medical Informatics                |
| Fan, Bingwen Eugene          | Tan Tock Seng Hospital                                          | Singapore      | Cardiovascular System & Hematology         | Immunology                         |
| Bloch, Evan M.               | Johns Hopkins School of Medicine                                | United States  | Cardiovascular System & Hematology         | Microbiology                       |
| Xia, Shuai                   | Fudan University                                                | China          | Virology                                   | Medicinal & Biomolecular Chemistry |
| Kampf, Günter                | Universitätsmedizin Greifswald                                  | Germany        | Epidemiology                               | Microbiology                       |
| Spinelli, A.                 | Humanitas Research Hospital                                     | Italy          | Surgery                                    | Gastroenterology & Hepatology      |
| Bernheim, Adam               | Icahn School of Medicine at Mount Sinai                         | United States  | Nuclear Medicine & Medical Imaging         | Microbiology                       |
| Li, Hui                      | China-Japan Friendship Hospital                                 | China          | Microbiology                               | Respiratory System                 |
| Petrosillo, Nicola           | IRCCS Istituto Nazionale Malattie Infettive Lazzaro Spallanzani | Italy          | Microbiology                               | General & Internal Medicine        |
| Park, Matthew D.             | Icahn School of Medicine at Mount Sinai                         | United States  | Immunology                                 | Oncology & Carcinogenesis          |
| Chen, Jieliang               | Fudan University                                                | China          | Virology                                   | Gastroenterology & Hepatology      |
| Armitage, Richard            | University of Nottingham                                        | United Kingdom | Pediatrics                                 | Public Health                      |
| Khosravi, Mohsen             | Zahedan University of Medical Sciences                          | Iran           | Psychiatry                                 | Neurology & Neurosurgery           |
| Tang, Yi Wei                 | Danaher Diagnostic Platform                                     | China          | Microbiology                               | Virology                           |
| Jarvis, Christopher I.       | London School of Hygiene & Tropical Medicine                    | United Kingdom | General & Internal Medicine                | Microbiology                       |
| Ng, Siew C.                  | Chinese University of Hong Kong                                 | Hong Kong      | Gastroenterology & Hepatology              | Oncology & Carcinogenesis          |
| Vaira, Luigi A.              | Azienda Ospedaliero Universitaria Sassari                       | Italy          | Otorhinolaryngology                        | Dentistry                          |
| Onder, Graziano              | Istituto Superiore Di Sanita                                    | Italy          | Geriatrics                                 | Gerontology                        |
| Beigel, John H.              | National Institute of Allergy and Infectious Diseases (NIAID)   | United States  | Microbiology                               | Virology                           |
| Bonilla-Aldana, D. Katterine | Fundación Universitaria Autónoma de las Américas                | Colombia       | Microbiology                               | Tropical Medicine                  |

|                        |                                                                                   |                |                                    |                                  |
|------------------------|-----------------------------------------------------------------------------------|----------------|------------------------------------|----------------------------------|
| Memish, Ziad A.        | Alfaisal University                                                               | Saudi Arabia   | General & Internal Medicine        | Microbiology                     |
| Harky, Amer            | Liverpool Heart and Chest Hospital                                                | United Kingdom | Cardiovascular System & Hematology | Respiratory System               |
| Merad, Miriam          | Icahn School of Medicine at Mount Sinai                                           | United States  | Immunology                         | Oncology & Carcinogenesis        |
| Viner, R. M.           | UCL Great Ormond Street Institute of Child Health                                 | United Kingdom | Pediatrics                         | General & Internal Medicine      |
| Amirian, E. Susan      | Rice University                                                                   | United States  | Oncology & Carcinogenesis          | Epidemiology                     |
| Hsueh, Po Ren          | National Taiwan University Hospital                                               | Taiwan         | Microbiology                       | General & Internal Medicine      |
| Chu, Hin               | The University of Hong Kong, State Key Laboratory of Emerging Infectious Diseases | Hong Kong      | Virology                           | Microbiology                     |
| Goyal, Parag           | Weill Cornell Medicine                                                            | United States  | Cardiovascular System & Hematology | General & Internal Medicine      |
| Kim, Hyungjin          | Seoul National University College of Medicine                                     | South Korea    | Nuclear Medicine & Medical Imaging | Oncology & Carcinogenesis        |
| Martinez, Miguel Angel | Hospital Universitari Germans Trias i Pujol                                       | Spain          | Virology                           | Biochemistry & Molecular Biology |
| Javaid, Mohd           | Jamia Millia Islamia                                                              | India          | Operations Research                | Materials                        |
| Grifoni, Alba          | La Jolla Institute for Immunology                                                 | United States  | Immunology                         | Virology                         |

Not listed are 30 authors who are journalists writing news stories or editors writing editorials for very prestigious journals (Mahase E, The Lancet , Iacobucci G, Cyranoski D, Livingstone E, Burki T, Day M, Kupferschmidt K, Wise J, Callaway E, Horton R, Ledford H, Cohen J, Dyer O, Webster P, Rosenbaum L, Thornton J, Rimmer A, Rubin R, Mallapaty S, Kirby T, Torjesen I, Tanne J, Abbasi J, The Lancet Infectious Diseases , Zarocostas J, Godlee F, Adam D, The Lancet Oncology, Abbasi K).
